# Supplementary material for: Anionic ribose related species explored through PES experiments, DFT calculations, and through comparison with anionic fructose species
Source: Royal Society of Chemistry journal article supplement (doi:10.1039/c7cp05830f), 2017-01-01
Supplement: c7cp05830f1.pdf [file c7cp05830f1.pdf]

*Supporting Information for*

***Anionic Ribose Related Species Explored Through PES Experiments, DFT Calculations, and  
Through Comparison with Anionic Fructose Species***

*Zhen Zeng, Elliot R. Bernstein\**

Department of Chemistry, NSF ERC for Extreme Ultraviolet Science and Technology, Colorado State  
University, Fort Collins, CO 80523, USA

AUTHOR INFORMATION

**Corresponding Author**

\*Elliot R. Bernstein, E-mail: [erb@lamar.colostate.edu](mailto:erb@lamar.colostate.edu).

More low lying isomers of ribose<sup>-</sup>, (ribose-H)<sup>-</sup>, and (ribose-H<sub>2</sub>O)<sup>-</sup> anions, as well as their corresponding neutrals, are summarized in Figures S4 to S6 as well as Figures S10 to S15 in the Supporting Information. Note that the figure numbers in the S.I. document are related to those of the text figures, as for example Figure S4 ⇔ Figure 4.

|                             |                                                                                     |                                                                                     |                                                                                      |                                                                                       |                                                                                     |
|-----------------------------|-------------------------------------------------------------------------------------|-------------------------------------------------------------------------------------|--------------------------------------------------------------------------------------|---------------------------------------------------------------------------------------|-------------------------------------------------------------------------------------|
| Optimized Anionic structure | 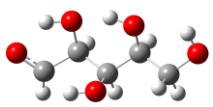   |    |    |    |  |
| Structural Polymorphism     | open chain                                                                          | open chain                                                                          | open chain                                                                           | open chain                                                                            | open chain                                                                          |
| $\Delta E$ (eV)             | 0.00                                                                                | 0.01                                                                                | 0.17                                                                                 | 0.25                                                                                  | 0.58                                                                                |
| VDE (eV)                    | <b>1.64</b>                                                                         | <b>1.73</b>                                                                         | <b>1.51</b>                                                                          | <b>1.06</b>                                                                           | <b>0.17</b>                                                                         |
| Optimized Anionic structure |    |    |    |    |  |
| Structural Polymorphism     | open chain                                                                          | $\beta$ -pyranose ( <sup>1</sup> C <sub>4</sub> - chair)                            | $\alpha$ -pyranose ( <sup>1</sup> C <sub>4</sub> - chair)                            | $\alpha$ -furanose (C <sub>2</sub> – endo)                                            | $\beta$ -furanose (C <sub>3</sub> – endo)                                           |
| $\Delta E$ (eV)             | 0.78                                                                                | 0.80                                                                                | 0.81                                                                                 | 0.81                                                                                  | 0.87                                                                                |
| VDE (eV)                    | <b>0.11</b>                                                                         | <b>-0.25</b>                                                                        | <b>-0.17</b>                                                                         | <b>-0.03</b>                                                                          | <b>-0.03</b>                                                                        |
| Optimized Anionic structure |  |  |  |  |                                                                                     |
| Structural Polymorphism     | $\alpha$ -pyranose ( <sup>4</sup> C <sub>1</sub> - chair)                           | $\beta$ -pyranose ( <sup>4</sup> C <sub>1</sub> - chair)                            | $\beta$ -furanose (C <sub>2</sub> – endo)                                            | $\alpha$ -furanose (C <sub>3</sub> – endo)                                            |                                                                                     |
| $\Delta E$ (eV)             | 0.89                                                                                | 0.91                                                                                | 0.98                                                                                 | 1.04                                                                                  |                                                                                     |
| VDE (eV)                    | <b>-0.18</b>                                                                        | <b>-0.29</b>                                                                        | <b>-0.19</b>                                                                         | <b>-0.10</b>                                                                          |                                                                                     |

Figure S4 Optimized geometries of the typical low lying anionic isomers of ribose<sup>-</sup> based on B3LYP/6-311++G(d,p) calculations. The relative energies and structural polymorphs are indicated. The structural presentation is the same as those in the main text Figures 4-6. For open chain structures (1)C to (5)C is ordered from left to right. For both furanose and pyranose structures (1)C to (5)C is ordered from right to left in a clockwise direction.

|                             |                                               |                                              |                                               |                                           |                                              |
|-----------------------------|-----------------------------------------------|----------------------------------------------|-----------------------------------------------|-------------------------------------------|----------------------------------------------|
| Optimized Anionic structure |                                               |                                              |                                               |                                           |                                              |
| Structural Polymorphism     | open chain (C) - (4C)H                        | open chain (C) - (3)H                        | $\alpha$ -pyranose ( ${}^1C_4$ -chair) - (2)H | open chain (A) - (2)H                     | open chain (B) - (2C)H                       |
| $\Delta E$ (eV)             | 0.00                                          | 0.11                                         | 0.22                                          | 0.25                                      | 0.27                                         |
| VDE (eV)                    | <b>3.16</b>                                   | <b>4.47</b>                                  | <b>3.75</b>                                   | <b>3.91</b>                               | <b>2.74</b>                                  |
| Optimized Anionic structure |                                               |                                              |                                               |                                           |                                              |
| Structural Polymorphism     | $\alpha$ -furanose ( $C_2$ -endo) - (1)H      | $\alpha$ -furanose ( $C_2$ -endo) - (3)H     | open chain (A) - (2C)H                        | open chain (B) - (2)H                     | $\beta$ -furanose ( $C_3$ -endo) - (1)H      |
| $\Delta E$ (eV)             | 0.27                                          | 0.27                                         | 0.28                                          | 0.29                                      | 0.29                                         |
| VDE (eV)                    | <b>3.79</b>                                   | <b>3.83</b>                                  | <b>2.64</b>                                   | <b>3.93</b>                               | <b>3.96</b>                                  |
| Optimized Anionic structure |                                               |                                              |                                               |                                           |                                              |
| Structural Polymorphism     | $\alpha$ -pyranose ( ${}^1C_4$ -chair) - (1)H | open chain (A) - (4C)H                       | open chain (C) - (2)H                         | open chain (C) - (2C)H                    | open chain (C) - (4)H                        |
| $\Delta E$ (eV)             | 0.35                                          | 0.42                                         | 0.43                                          | 0.45                                      | 0.48                                         |
| VDE (eV)                    | <b>3.72</b>                                   | <b>2.99</b>                                  | <b>3.76</b>                                   | <b>2.54</b>                               | <b>4.01</b>                                  |
| Optimized Anionic structure |                                               |                                              |                                               |                                           |                                              |
| Structural Polymorphism     | $\beta$ -pyranose ( ${}^1C_4$ -chair) - (2)H  | $\beta$ -pyranose ( ${}^1C_4$ -chair) - (4)H | $\beta$ -pyranose ( ${}^1C_4$ -chair) - (3)H  | $\alpha$ -furanose ( $C_2$ -endo) - (5C)H | $\beta$ -furanose ( $C_3$ -endo) - (1)H      |
| $\Delta E$ (eV)             | 0.52                                          | 0.52                                         | 0.56                                          | 0.59                                      | 0.64                                         |
| VDE (eV)                    | <b>3.31</b>                                   | <b>3.32</b>                                  | <b>3.67</b>                                   | <b>3.50</b>                               | <b>3.67</b>                                  |
| Optimized Anionic structure |                                               |                                              |                                               |                                           |                                              |
| Structural Polymorphism     | open chain (A) - (4)H                         | open chain (A) - (3)H                        | $\beta$ -furanose ( $C_3$ -endo) - (3)H       | $\alpha$ -furanose ( $C_2$ -endo) - (2)H  | $\beta$ -pyranose ( ${}^1C_4$ -chair) - (1)H |
| $\Delta E$ (eV)             | 0.73                                          | 0.75                                         | 0.78                                          | 0.79                                      | 0.79                                         |
| VDE (eV)                    | <b>3.42</b>                                   | <b>4.17</b>                                  | <b>3.28</b>                                   | <b>3.28</b>                               | <b>3.20</b>                                  |
| Optimized Anionic structure |                                               |                                              |                                               |                                           |                                              |

|                             |                                                |                                               |                                            |                                               |                                               |
|-----------------------------|------------------------------------------------|-----------------------------------------------|--------------------------------------------|-----------------------------------------------|-----------------------------------------------|
| Structural Polymorphism     | $\beta$ -furanose ( $C_3$ - endo) - (2)H       | open chain (D) - (2C)H                        | open chain (C) - (3)H                      | $\alpha$ -pyranose ( ${}^1C_4$ -chair) - (3)H | $\alpha$ -pyranose ( ${}^1C_4$ -chair) - (4)H |
| $\Delta E$ (eV)             | 0.80                                           | 0.86                                          | 0.94                                       | 1.14                                          | 1.17                                          |
| VDE (eV)                    | <b>3.40</b>                                    | <b>2.25</b>                                   | <b>4.06</b>                                | <b>2.83</b>                                   | <b>2.81</b>                                   |
| Optimized Anionic structure |                                                |                                               |                                            |                                               |                                               |
| Structural Polymorphism     | open chain (B) - (3C)H                         | open chain (A) - (3C)H                        | $\beta$ -furanose ( $C_3$ - endo) - (5)H   | open chain (A) - (1C)H                        | open chain (A) - (5)H                         |
| $\Delta E$ (eV)             | 1.26                                           | 1.30                                          | 1.36                                       | 1.43                                          | 1.52                                          |
| VDE (eV)                    | <b>3.41</b>                                    | <b>3.53</b>                                   | <b>2.71</b>                                | <b>2.47</b>                                   | <b>2.58</b>                                   |
| Optimized Anionic structure |                                                |                                               |                                            |                                               |                                               |
| Structural Polymorphism     | open chain (C) - (3C)H                         | open chain (C) - (1C)H                        | open chain (D) - (4C)H                     | $\alpha$ -furanose ( $C_2$ - endo) - (4C)H    | $\beta$ -furanose ( $C_3$ - endo) - (4C)H     |
| $\Delta E$ (eV)             | 1.56                                           | 1.60                                          | 1.73                                       | 1.77                                          | 1.78                                          |
| VDE (eV)                    | <b>2.40</b>                                    | <b>2.35</b>                                   | <b>2.60</b>                                | <b>2.27</b>                                   | <b>2.16</b>                                   |
| Optimized Anionic structure |                                                |                                               |                                            |                                               |                                               |
| Structural Polymorphism     | $\beta$ -pyranose ( ${}^1C_4$ -chair) - (5C)H  | open chain (B) - (4C)H                        | $\alpha$ -furanose ( $C_2$ - endo) - (2C)H | $\alpha$ -furanose ( $C_2$ - endo) - (1C)H    | $\beta$ -pyranose ( ${}^1C_4$ -chair) - (2C)H |
| $\Delta E$ (eV)             | 1.83                                           | 2.05                                          | 2.21                                       | 2.21                                          | 2.23                                          |
| VDE (eV)                    | <b>2.29</b>                                    | <b>1.74</b>                                   | <b>1.75</b>                                | <b>2.24</b>                                   | <b>2.01</b>                                   |
| Optimized Anionic structure |                                                |                                               |                                            |                                               |                                               |
| Structural Polymorphism     | $\alpha$ -pyranose ( ${}^1C_4$ -chair) - (5C)H | $\beta$ -pyranose ( ${}^1C_4$ -chair) - (1C)H | open chain (C) - (5C)H                     | open chain (A) - (5C)H                        |                                               |
| $\Delta E$ (eV)             | 2.24                                           | 2.67                                          | 2.94                                       | 3.04                                          |                                               |
| VDE (eV)                    | <b>1.93</b>                                    | <b>1.54</b>                                   | 1.06                                       | 0.64                                          |                                               |

Figure S5 Optimized geometries of the typical low lying anionic isomers of (ribose-H)<sup>-</sup> based on B3LYP/6-311++G(d,p) calculations. The relative energies and structural polymorphs are indicated. The green square indicates loss of hydrogen at the indicated position. The green labels indicate loss of hydrogen from carbon atom. The structural presentation is the same as those in the main text Figures 4-6. For open chain structures (1)C to (5)C is ordered from left to right. For both furanose and pyranose structures (1)C to (5)C is ordered from right to left in a clockwise direction.

|                             |                                                                                     |                                                                                     |                                                                                      |                                                                                       |                                                                                       |
|-----------------------------|-------------------------------------------------------------------------------------|-------------------------------------------------------------------------------------|--------------------------------------------------------------------------------------|---------------------------------------------------------------------------------------|---------------------------------------------------------------------------------------|
| Optimized Anionic structure | 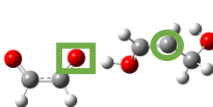   |    |    |    |    |
| Structural Polymorphism     | open chain (C) - (2)H - (4)OH                                                       | open chain (A) - [(2)H + (4)OH]                                                     | open chain (C) - (4C)H - (5)OH                                                       | open chain (A) - (3C)H - (2)OH                                                        | open chain (A) - (2C)H - (3)OH                                                        |
| $\Delta E$ (eV)             | 0.00                                                                                | 0.04                                                                                | 0.32                                                                                 | 0.41                                                                                  | 0.41                                                                                  |
| VDE (eV)                    | <b>3.13</b>                                                                         | <b>3.09</b>                                                                         | <b>2.16</b>                                                                          | <b>1.05</b>                                                                           | <b>1.50</b>                                                                           |
| Optimized Anionic structure |    |    |    |    |    |
| Structural Polymorphism     | open chain (C) - (2C)H - (3)OH                                                      | open chain (A) - (4C)H - (5)OH                                                      | open chain (B) - (2C)H - (3)OH                                                       | open chain (A) - (3C)H - (3)OH                                                        | open chain (A) - [(4)H + (2)OH]                                                       |
| $\Delta E$ (eV)             | 0.43                                                                                | 0.44                                                                                | 0.57                                                                                 | 0.59                                                                                  | 0.85                                                                                  |
| VDE (eV)                    | <b>1.58</b>                                                                         | <b>1.97</b>                                                                         | <b>1.50</b>                                                                          | <b>1.01</b>                                                                           | <b>3.85</b>                                                                           |
| Optimized Anionic structure |    |    |    |    |    |
| Structural Polymorphism     | open chain (A) - (2)OH - (4)H                                                       | open chain (A) - (4)H - (2)OH                                                       | open chain (A) - (2)OH - (1)H                                                        | open chain (C) - (3)H - (2)OH                                                         | $\beta$ -furanose (C <sub>3</sub> - endo) - (4C)H - (2/3)OH                           |
| $\Delta E$ (eV)             | 0.94                                                                                | 0.94                                                                                | 0.94                                                                                 | 1.02                                                                                  | 1.03                                                                                  |
| VDE (eV)                    | <b>3.86</b>                                                                         | <b>4.08</b>                                                                         | <b>3.90</b>                                                                          | <b>4.00</b>                                                                           | <b>2.84</b>                                                                           |
| Optimized Anionic structure |  |  |  |  |  |
| Structural Polymorphism     | open chain (A) - (3C)H - (4)OH                                                      | $\beta$ -pyranose ( <sup>1</sup> C <sub>4</sub> -chair) - (5C)H - (3/4)OH           | open chain (A) - [(3)H + (2)OH]                                                      | open chain (A) - (1C)H - (2)OH                                                        | $\beta$ -pyranose ( <sup>1</sup> C <sub>4</sub> -chair) - (1C)H - (4)OH               |
| $\Delta E$ (eV)             | 1.04                                                                                | 1.08                                                                                | 1.09                                                                                 | 1.11                                                                                  | 1.18                                                                                  |
| VDE (eV)                    | <b>1.60</b>                                                                         | <b>2.64</b>                                                                         | <b>4.20</b>                                                                          | <b>2.39</b>                                                                           | <b>0.58</b>                                                                           |
| Optimized Anionic structure |  |  |  |  |  |
| Structural Polymorphism     | $\alpha$ -pyranose ( <sup>1</sup> C <sub>4</sub> -chair) - (1)H - (2)OH             | $\alpha$ -furanose (C <sub>2</sub> - endo) - (1C)H - (5)OH                          | open chain (C) - (1C)H - (2)OH                                                       | $\beta$ -furanose (C <sub>3</sub> - endo) - (5)OH - (2)H                              | $\beta$ -furanose (C <sub>3</sub> - endo) - (1)H - (2)OH                              |
| $\Delta E$ (eV)             | 1.27                                                                                | 1.27                                                                                | 1.29                                                                                 | 1.29                                                                                  | 1.34                                                                                  |
| VDE (eV)                    | <b>3.30</b>                                                                         | <b>1.07</b>                                                                         | <b>2.28</b>                                                                          | <b>0.75</b>                                                                           | <b>3.79</b>                                                                           |
| Optimized Anionic structure |  |  |  |  |  |

|                             |                                                                                     |                                                                                     |                                                                                     |                                                                                       |                                                                                       |
|-----------------------------|-------------------------------------------------------------------------------------|-------------------------------------------------------------------------------------|-------------------------------------------------------------------------------------|---------------------------------------------------------------------------------------|---------------------------------------------------------------------------------------|
| Structural Polymorphism     | $\beta$ -furanose (C <sub>3</sub> – endo) - (1)H - (2)OH                            | open chain (B) - (4C)H - (5)OH                                                      | $\beta$ -furanose (C <sub>3</sub> – endo) - (1)H - (3)OH                            | open chain (A) - (2C)H - (4)OH                                                        | open chain (A) - (5C)H - (2)OH                                                        |
| $\Delta E$ (eV)             | 1.35                                                                                | 1.36                                                                                | 1.39                                                                                | 1.46                                                                                  | 1.48                                                                                  |
| VDE (eV)                    | <b>4.06</b>                                                                         | <b>1.10</b>                                                                         | <b>3.41</b>                                                                         | <b>2.88</b>                                                                           | <b>3.66</b>                                                                           |
| Optimized Anionic structure | 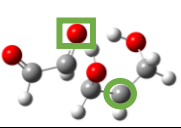   |    |    |    |    |
| Structural Polymorphism     | open chain (A) – [(2)H + (4)OH]                                                     | open chain (C) - (2C)H - (4)OH                                                      | open chain (C) - (3)H - (4)OH                                                       | $\beta$ -furanose (C <sub>3</sub> – endo) - (1)H - (3)OH                              | open chain (C) - (3)H - (5)OH                                                         |
| $\Delta E$ (eV)             | 1.50                                                                                | 1.50                                                                                | 1.51                                                                                | 1.54                                                                                  | 1.57                                                                                  |
| VDE (eV)                    | <b>3.30</b>                                                                         | <b>2.64</b>                                                                         | <b>3.27</b>                                                                         | <b>3.65</b>                                                                           | <b>3.82</b>                                                                           |
| Optimized Anionic structure |    |    |    |    |    |
| Structural Polymorphism     | $\alpha$ -furanose (C <sub>2</sub> – endo) - (1)H - (3)OH                           | $\alpha$ -furanose (C <sub>2</sub> – endo) - (1)H - (4C)OH                          | $\alpha$ -pyranose ( <sup>1</sup> C <sub>4</sub> -chair) - (1)H - (3)OH             | $\alpha$ -furanose (C <sub>2</sub> – endo) - (1)H - (5)OH                             | $\alpha$ -furanose (C <sub>2</sub> – endo) – [(1)H + (5)OH]                           |
| $\Delta E$ (eV)             | 1.59                                                                                | 1.60                                                                                | 1.61                                                                                | 1.63                                                                                  | 1.63                                                                                  |
| VDE (eV)                    | <b>3.62</b>                                                                         | <b>3.21</b>                                                                         | <b>2.78</b>                                                                         | <b>3.86</b>                                                                           | <b>3.86</b>                                                                           |
| Optimized Anionic structure |  |  |  |  |  |
| Structural Polymorphism     | open chain (A) – [(2)H + (3)OH]                                                     | open chain (C) - (2C)H - (5)OH                                                      | $\alpha$ -pyranose ( <sup>1</sup> C <sub>4</sub> -chair) - (5C)H - (1)OH            | open chain (A) – [(2)H + (5)OH]                                                       | open chain (A) - (3)OH - (5)H                                                         |
| $\Delta E$ (eV)             | 1.63                                                                                | 1.63                                                                                | 1.64                                                                                | 1.66                                                                                  | 1.67                                                                                  |
| VDE (eV)                    | <b>3.23</b>                                                                         | <b>3.06</b>                                                                         | <b>0.76</b>                                                                         | <b>3.82</b>                                                                           | <b>3.55</b>                                                                           |
| Optimized Anionic structure |  |  |  |  |  |
| Structural Polymorphism     | $\beta$ -pyranose ( <sup>1</sup> C <sub>4</sub> -chair) - (5C)H - (1/4)OH           | $\alpha$ -pyranose ( <sup>1</sup> C <sub>4</sub> -chair) - (2)H - (3)OH             | $\alpha$ -pyranose ( <sup>1</sup> C <sub>4</sub> -chair) - (2)H - (4)OH             | $\beta$ -pyranose ( <sup>1</sup> C <sub>4</sub> -chair) - (1)H - (4)OH                | open chain (A) – [(4)H + (3)OH]                                                       |
| $\Delta E$ (eV)             | 1.68                                                                                | 1.70                                                                                | 1.71                                                                                | 1.71                                                                                  | 1.72                                                                                  |
| VDE (eV)                    | <b>2.69</b>                                                                         | <b>3.35</b>                                                                         | <b>3.26</b>                                                                         | <b>3.47</b>                                                                           | <b>3.25</b>                                                                           |
| Optimized Anionic structure |  |  |  |  |  |

|                             |                                                                        |                                                                         |                                                                         |                                                                         |                                                                         |
|-----------------------------|------------------------------------------------------------------------|-------------------------------------------------------------------------|-------------------------------------------------------------------------|-------------------------------------------------------------------------|-------------------------------------------------------------------------|
| Structural Polymorphism     | open chain (A) - (4)H - (3)OH                                          | open chain (A) - (2)OH - (5)H                                           | open chain (A) - (5)H - (2)OH                                           | $\alpha$ -furanose (C <sub>2</sub> - endo) - (1)H - (2)OH               | $\beta$ -furanose (C <sub>3</sub> - endo) - (1)H - (3)OH                |
| $\Delta E$ (eV)             | 1.72                                                                   | 1.73                                                                    | 1.74                                                                    | 1.75                                                                    | 1.76                                                                    |
| VDE (eV)                    | <b>3.13</b>                                                            | <b>4.34</b>                                                             | <b>4.11</b>                                                             | <b>3.28</b>                                                             | <b>3.23</b>                                                             |
| Optimized Anionic structure |                                                                        |                                                                         |                                                                         |                                                                         |                                                                         |
| Structural Polymorphism     | $\beta$ -pyranose ( <sup>1</sup> C <sub>4</sub> -chair) - (2)H - (1)OH | $\alpha$ -pyranose ( <sup>1</sup> C <sub>4</sub> -chair) - (2)H - (1)OH | $\alpha$ -pyranose ( <sup>1</sup> C <sub>4</sub> -chair) - (1)H - (4)OH | $\alpha$ -pyranose ( <sup>1</sup> C <sub>4</sub> -chair) - (4)H - (1)OH | $\alpha$ -pyranose ( <sup>1</sup> C <sub>4</sub> -chair) - (3)H - (1)OH |
| $\Delta E$ (eV)             | 1.79                                                                   | 1.80                                                                    | 1.80                                                                    | 1.80                                                                    | 1.82                                                                    |
| VDE (eV)                    | <b>2.67</b>                                                            | <b>2.67</b>                                                             | <b>3.71</b>                                                             | <b>3.12</b>                                                             | <b>3.20</b>                                                             |
| Optimized Anionic structure |                                                                        |                                                                         |                                                                         |                                                                         |                                                                         |
| Structural Polymorphism     | open chain (A) - [(5)H + (2)OH]                                        | $\beta$ -furanose (C <sub>3</sub> - endo) - (4)H - (5)OH                | open chain (A) - (1C)H - (3)OH                                          | open chain (C) - (2)H - (3)OH                                           | $\alpha$ -pyranose ( <sup>1</sup> C <sub>4</sub> -chair) - (4)H - (3)OH |
| $\Delta E$ (eV)             | 1.82                                                                   | 1.82                                                                    | 1.82                                                                    | 1.83                                                                    | 1.83                                                                    |
| VDE (eV)                    | <b>4.29</b>                                                            | <b>2.96</b>                                                             | <b>0.28</b>                                                             | <b>3.20</b>                                                             | <b>3.07</b>                                                             |
| Optimized Anionic structure |                                                                        |                                                                         |                                                                         |                                                                         |                                                                         |
| Structural Polymorphism     | $\beta$ -pyranose ( <sup>1</sup> C <sub>4</sub> -chair) - (1)H - (2)OH | $\beta$ -furanose (C <sub>3</sub> - endo) - (1)H - (5)OH                | open chain (A) - (3)OH - (4)H                                           | $\beta$ -furanose (C <sub>3</sub> - endo) - (2)H - (5)OH                | $\alpha$ -furanose (C <sub>2</sub> - endo) - (3)H - (1)OH               |
| $\Delta E$ (eV)             | 1.83                                                                   | 1.84                                                                    | 1.85                                                                    | 1.86                                                                    | 1.86                                                                    |
| VDE (eV)                    | <b>2.96</b>                                                            | <b>3.40</b>                                                             | <b>3.03</b>                                                             | <b>3.54</b>                                                             | <b>2.81</b>                                                             |
| Optimized Anionic structure |                                                                        |                                                                         |                                                                         |                                                                         |                                                                         |
| Structural Polymorphism     | open chain (C) - (1C)H - (3)OH                                         | open chain (C) - (4C)H - (4)OH                                          | $\alpha$ -furanose (C <sub>2</sub> - endo) - (3)H - (2)OH               | open chain (A) - (3)H - (4)OH                                           | $\alpha$ -furanose (C <sub>2</sub> - endo) - (2C)H - (3)OH              |
| $\Delta E$ (eV)             | 1.88                                                                   | 1.89                                                                    | 1.90                                                                    | 1.94                                                                    | 1.94                                                                    |
| VDE (eV)                    | <b>0.39</b>                                                            | <b>3.82</b>                                                             | <b>3.11</b>                                                             | <b>3.61</b>                                                             | <b>-0.11</b>                                                            |
| Optimized Anionic structure |                                                                        |                                                                         |                                                                         |                                                                         |                                                                         |
| Structural Polymorphism     | $\alpha$ -furanose (C <sub>2</sub> - endo) - (1C)H - (2)OH             | $\beta$ -pyranose ( <sup>1</sup> C <sub>4</sub> -chair) - (1)H - (3)OH  | $\alpha$ -furanose (C <sub>2</sub> - endo) - (2)H - (1)OH               | open chain (C) - (3)H - (4)OH                                           | $\beta$ -pyranose ( <sup>1</sup> C <sub>4</sub> -chair) - (1C)H - (2)OH |
| $\Delta E$ (eV)             | 1.95                                                                   | 1.95                                                                    | 1.95                                                                    | 1.96                                                                    | 1.96                                                                    |

| VDE (eV)                    | -0.25                                                 | 3.02                                                                      | 2.72                                                   | 3.44                                                                     | -0.32                                                |
|-----------------------------|-------------------------------------------------------|---------------------------------------------------------------------------|--------------------------------------------------------|--------------------------------------------------------------------------|------------------------------------------------------|
| Optimized Anionic structure |                                                       |                                                                           |                                                        |                                                                          |                                                      |
| Structural Polymorphism     | $\beta$ -pyranose ( ${}^1C_4$ -chair) - (2C)H - (3)OH | $\alpha$ -furanose ( $C_2$ -endo) - (5)OH - (2)H with (1)OH transferring  | $\alpha$ -pyranose ( ${}^1C_4$ -chair) - (5C)H - (4)OH | $\alpha$ -furanose ( $C_2$ -endo) - (4C)H - (5)OH                        | $\alpha$ -furanose ( $C_2$ -endo) - [(3)H + (5)OH]   |
| $\Delta E$ (eV)             | 1.97                                                  | 1.99                                                                      | 1.99                                                   | 2.00                                                                     | 2.01                                                 |
| VDE (eV)                    | <b>-0.24</b>                                          | <b>4.44</b>                                                               | <b>-0.19</b>                                           | <b>-0.03</b>                                                             | <b>2.97</b>                                          |
| Optimized Anionic structure |                                                       |                                                                           |                                                        |                                                                          |                                                      |
| Structural Polymorphism     | $\beta$ -pyranose ( ${}^1C_4$ -chair) - (3)H - (2)OH  | $\beta$ -furanose ( $C_3$ -endo) - (1)H - (5)OH                           | $\beta$ -furanose ( $C_3$ -endo) - (3)H - (1)OH        | $\beta$ -pyranose ( ${}^1C_4$ -chair) - (4)H - (3)OH                     | $\alpha$ -furanose ( $C_2$ -endo) - (4C)H - (3)OH    |
| $\Delta E$ (eV)             | 2.02                                                  | 2.03                                                                      | 2.04                                                   | 2.05                                                                     | 2.05                                                 |
| VDE (eV)                    | <b>3.03</b>                                           | <b>3.32</b>                                                               | <b>2.69</b>                                            | <b>2.85</b>                                                              | <b>-0.24</b>                                         |
| Optimized Anionic structure |                                                       |                                                                           |                                                        |                                                                          |                                                      |
| Structural Polymorphism     | $\beta$ -pyranose ( ${}^1C_4$ -chair) - (2)H - (3)OH  | $\alpha$ -furanose ( $C_2$ -endo) - (5C)H - (5)OH with (1)OH transferring | $\alpha$ -pyranose ( ${}^1C_4$ -chair) - (4)H - (2)OH  | $\alpha$ -furanose ( $C_2$ -endo) - (5)OH - (3)H with (1)OH transferring | $\beta$ -pyranose ( ${}^1C_4$ -chair) - (2)H - (4)OH |
| $\Delta E$ (eV)             | 2.05                                                  | 2.06                                                                      | 2.06                                                   | 2.07                                                                     | 2.07                                                 |
| VDE (eV)                    | <b>2.84</b>                                           | <b>4.62</b>                                                               | <b>2.84</b>                                            | <b>4.55</b>                                                              | <b>2.81</b>                                          |
| Optimized Anionic structure |                                                       |                                                                           |                                                        |                                                                          |                                                      |
| Structural Polymorphism     | $\alpha$ -furanose ( $C_2$ -endo) - (2)H - (5)OH      | $\alpha$ -furanose ( $C_2$ -endo) - [(2)H + (5)OH]                        | $\beta$ -pyranose ( ${}^1C_4$ -chair) - (2C)H - (1)OH  | $\beta$ -furanose ( $C_3$ -endo) - (5)OH - (3)H                          | open chain (A) - (2C)H - (2)OH                       |
| $\Delta E$ (eV)             | 2.08                                                  | 2.08                                                                      | 2.09                                                   | 2.09                                                                     | 2.09                                                 |
| VDE (eV)                    | <b>3.45</b>                                           | <b>3.45</b>                                                               | <b>-0.03</b>                                           | <b>4.28</b>                                                              | <b>3.54</b>                                          |
| Optimized Anionic structure |                                                       |                                                                           |                                                        |                                                                          |                                                      |



|                             |                                                                                     |                                                                                     |                                                                                      |                                                                                       |                                                                                       |
|-----------------------------|-------------------------------------------------------------------------------------|-------------------------------------------------------------------------------------|--------------------------------------------------------------------------------------|---------------------------------------------------------------------------------------|---------------------------------------------------------------------------------------|
| Structural Polymorphism     | $\beta$ -furanose ( $C_3$ - endo) - (3)H - (2)OH                                    | $\beta$ -furanose ( $C_3$ - endo) - (4C)H - (3)OH                                   | $\beta$ -pyranose ( ${}^1C_4$ - chair) - (3)H - (4)OH                                | $\alpha$ -furanose ( $C_2$ - endo) - (5)OH - (1)H with (1)O transferring              | $\alpha$ -pyranose ( ${}^1C_4$ -chair) - (3)H - (2)OH                                 |
| $\Delta E$ (eV)             | 2.10                                                                                | 2.13                                                                                | 2.13                                                                                 | 2.13                                                                                  | 2.13                                                                                  |
| VDE (eV)                    | <b>2.97</b>                                                                         | <b>0.52</b>                                                                         | <b>3.02</b>                                                                          | <b>5.82</b>                                                                           | <b>3.07</b>                                                                           |
| Optimized Anionic structure | 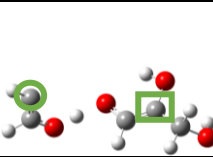   |    |    |    |    |
| Structural Polymorphism     | open chain (C) - (4C)H - (2)OH                                                      | $\beta$ -furanose ( $C_3$ - endo) - (2)H - (3)OH                                    | open chain (C) - (4C)H - (2)OH                                                       | open chain (A) - (4C)H - (2)OH                                                        | open chain (A) - (3)H - (5)OH                                                         |
| $\Delta E$ (eV)             | 2.14                                                                                | 2.14                                                                                | 2.14                                                                                 | 2.14                                                                                  | 2.15                                                                                  |
| VDE (eV)                    | <b>3.94</b>                                                                         | <b>2.83</b>                                                                         | <b>3.94</b>                                                                          | <b>2.69</b>                                                                           | <b>3.84</b>                                                                           |
| Optimized Anionic structure |    |    |    |    |    |
| Structural Polymorphism     | $\beta$ -furanose ( $C_3$ - endo) - (2)H - (1)OH                                    | $\beta$ -pyranose ( ${}^1C_4$ - chair) - (5C)H - (4)OH                              | open chain (A) - (3)H - (2)OH                                                        | open chain (C) - (2C)H - (2)OH                                                        | open chain (A) - [(5)H + (3)OH]                                                       |
| $\Delta E$ (eV)             | 2.15                                                                                | 2.19                                                                                | 2.23                                                                                 | 2.25                                                                                  | 2.27                                                                                  |
| VDE (eV)                    | <b>2.37</b>                                                                         | <b>-0.37</b>                                                                        | <b>3.61</b>                                                                          | <b>3.41</b>                                                                           | <b>2.64</b>                                                                           |
| Optimized Anionic structure |  |  |  |  |  |
| Structural Polymorphism     | open chain (A) - (5)H - (3)OH                                                       | $\beta$ -furanose ( $C_3$ - endo) - (4C)H - (5)OH                                   | $\alpha$ -furanose ( $C_2$ - endo) - (2C)H - (1)OH                                   | open chain (A) - [(4)H + (5)OH]                                                       | $\beta$ -furanose ( $C_3$ - endo) - (5)OH - (1)H                                      |
| $\Delta E$ (eV)             | 2.27                                                                                | 2.27                                                                                | 2.29                                                                                 | 2.30                                                                                  | 2.37                                                                                  |
| VDE (eV)                    | <b>2.54</b>                                                                         | <b>0.41</b>                                                                         | <b>-0.004</b>                                                                        | <b>2.87</b>                                                                           | <b>3.53</b>                                                                           |
| Optimized Anionic structure |  |  |  |  |  |
| Structural Polymorphism     | open chain (A) - (4C)H - (4)OH                                                      | $\alpha$ -furanose ( $C_2$ - endo) - (4C)H - (2)OH                                  | open chain (C) - (3)H - (2)OH                                                        | open chain (A) - (5)H - (4)OH                                                         | $\alpha$ -furanose ( $C_2$ - endo) - (3)H - (4)OH                                     |
| $\Delta E$ (eV)             | 2.38                                                                                | 2.40                                                                                | 2.43                                                                                 | 2.46                                                                                  | 2.54                                                                                  |
| VDE (eV)                    | <b>3.86</b>                                                                         | <b>2.35</b>                                                                         | <b>3.44</b>                                                                          | <b>2.82</b>                                                                           | <b>2.68</b>                                                                           |

|                             |                                                        |                                                         |                                                        |                                                         |                                                    |
|-----------------------------|--------------------------------------------------------|---------------------------------------------------------|--------------------------------------------------------|---------------------------------------------------------|----------------------------------------------------|
| Optimized Anionic structure |                                                        |                                                         |                                                        |                                                         |                                                    |
| Structural Polymorphism     | $\beta$ -furanose ( $C_3$ - endo) - (5)H - (1)OH       | open chain (A) - (1C)H - (4)OH                          | $\beta$ -furanose ( $C_3$ - endo) - (5)H - (2)OH       | open chain (A) - (3C)H - (5)OH                          | open chain (A) - [(5)H + (4)OH]                    |
| $\Delta E$ (eV)             | 2.58                                                   | 2.59                                                    | 2.61                                                   | 2.67                                                    | 2.67                                               |
| VDE (eV)                    | <b>2.98</b>                                            | <b>2.83</b>                                             | <b>3.50</b>                                            | <b>3.72</b>                                             | <b>2.65</b>                                        |
| Optimized Anionic structure |                                                        |                                                         |                                                        |                                                         |                                                    |
| Structural Polymorphism     | open chain (C) - (1C)H - (4)OH                         | $\alpha$ -pyranose ( ${}^1C_4$ - chair) - (3)H - (4)OH  | open chain (A) - (4C)H - (3)OH                         | open chain (A) - (1C)H - (5)OH                          | $\alpha$ -furanose ( $C_2$ - endo) - (4C)H - (1)OH |
| $\Delta E$ (eV)             | 2.69                                                   | 2.73                                                    | 2.77                                                   | 2.80                                                    | 2.94                                               |
| VDE (eV)                    | <b>2.69</b>                                            | <b>2.67</b>                                             | <b>3.40</b>                                            | <b>3.25</b>                                             | <b>1.91</b>                                        |
| Optimized Anionic structure |                                                        |                                                         |                                                        |                                                         |                                                    |
| Structural Polymorphism     | $\beta$ -furanose ( $C_3$ - endo) - (4C)H - (1)OH      | $\beta$ -pyranose ( ${}^1C_4$ - chair) - (1C)H - (3)OH  | $\alpha$ -furanose ( $C_2$ - endo) - (1C)H - (1)OH     | $\beta$ -pyranose ( ${}^1C_4$ - chair) - (5C)H - (2)OH  | $\alpha$ -furanose ( $C_2$ - endo) - (2C)H - (2)OH |
| $\Delta E$ (eV)             | 3.02                                                   | 3.04                                                    | 3.12                                                   | 3.13                                                    | 3.17                                               |
| VDE (eV)                    | <b>1.62</b>                                            | <b>2.06</b>                                             | <b>1.42</b>                                            | <b>3.11</b>                                             | <b>2.18</b>                                        |
| Optimized Anionic structure |                                                        |                                                         |                                                        |                                                         |                                                    |
| Structural Polymorphism     | $\beta$ -pyranose ( ${}^1C_4$ - chair) - (2C)H - (2)OH | $\alpha$ -pyranose ( ${}^1C_4$ - chair) - (5C)H - (3)OH | $\beta$ -pyranose ( ${}^1C_4$ - chair) - (2C)H - (4)OH | $\alpha$ -pyranose ( ${}^1C_4$ - chair) - (5C)H - (1)OH | $\alpha$ -furanose ( $C_2$ - endo) - (2C)H - (5)OH |
| $\Delta E$ (eV)             | 3.20                                                   | 3.26                                                    | 3.32                                                   | 3.42                                                    | 3.44                                               |
| VDE (eV)                    | <b>2.24</b>                                            | <b>1.92</b>                                             | 1.62                                                   | 2.05                                                    | <b>2.01</b>                                        |
| Optimized Anionic structure |                                                        |                                                         |                                                        |                                                         |                                                    |
| Structural Polymorphism     | $\alpha$ -furanose ( $C_2$ - endo) - (1C)H - (3)OH     | $\beta$ -pyranose ( ${}^1C_4$ - chair) - (1C)H - (1)OH  | open chain (C) - (5C)H - (5)OH                         |                                                         |                                                    |
| $\Delta E$ (eV)             | 3.52                                                   | 3.81                                                    | 4.09                                                   |                                                         |                                                    |
| VDE (eV)                    | <b>2.70</b>                                            | <b>1.46</b>                                             | <b>1.61</b>                                            |                                                         |                                                    |

Figure S6 Optimized geometries of the typical low lying anionic isomers of (ribose-H<sub>2</sub>O)<sup>-</sup> based on B3LYP/6-311++G(d,p) calculations. The relative energies and structural polymorphs are indicated. The green square indicates loss of hydrogen and the green circle indicates loss of an OH group. The structural presentation is the same as those in the main text Figures 4-6. For open chain structures (1)C to (5)C is ordered from left to right. For both furanose and pyranose structures (1)C to (5)C is ordered from right to left in a clockwise direction.

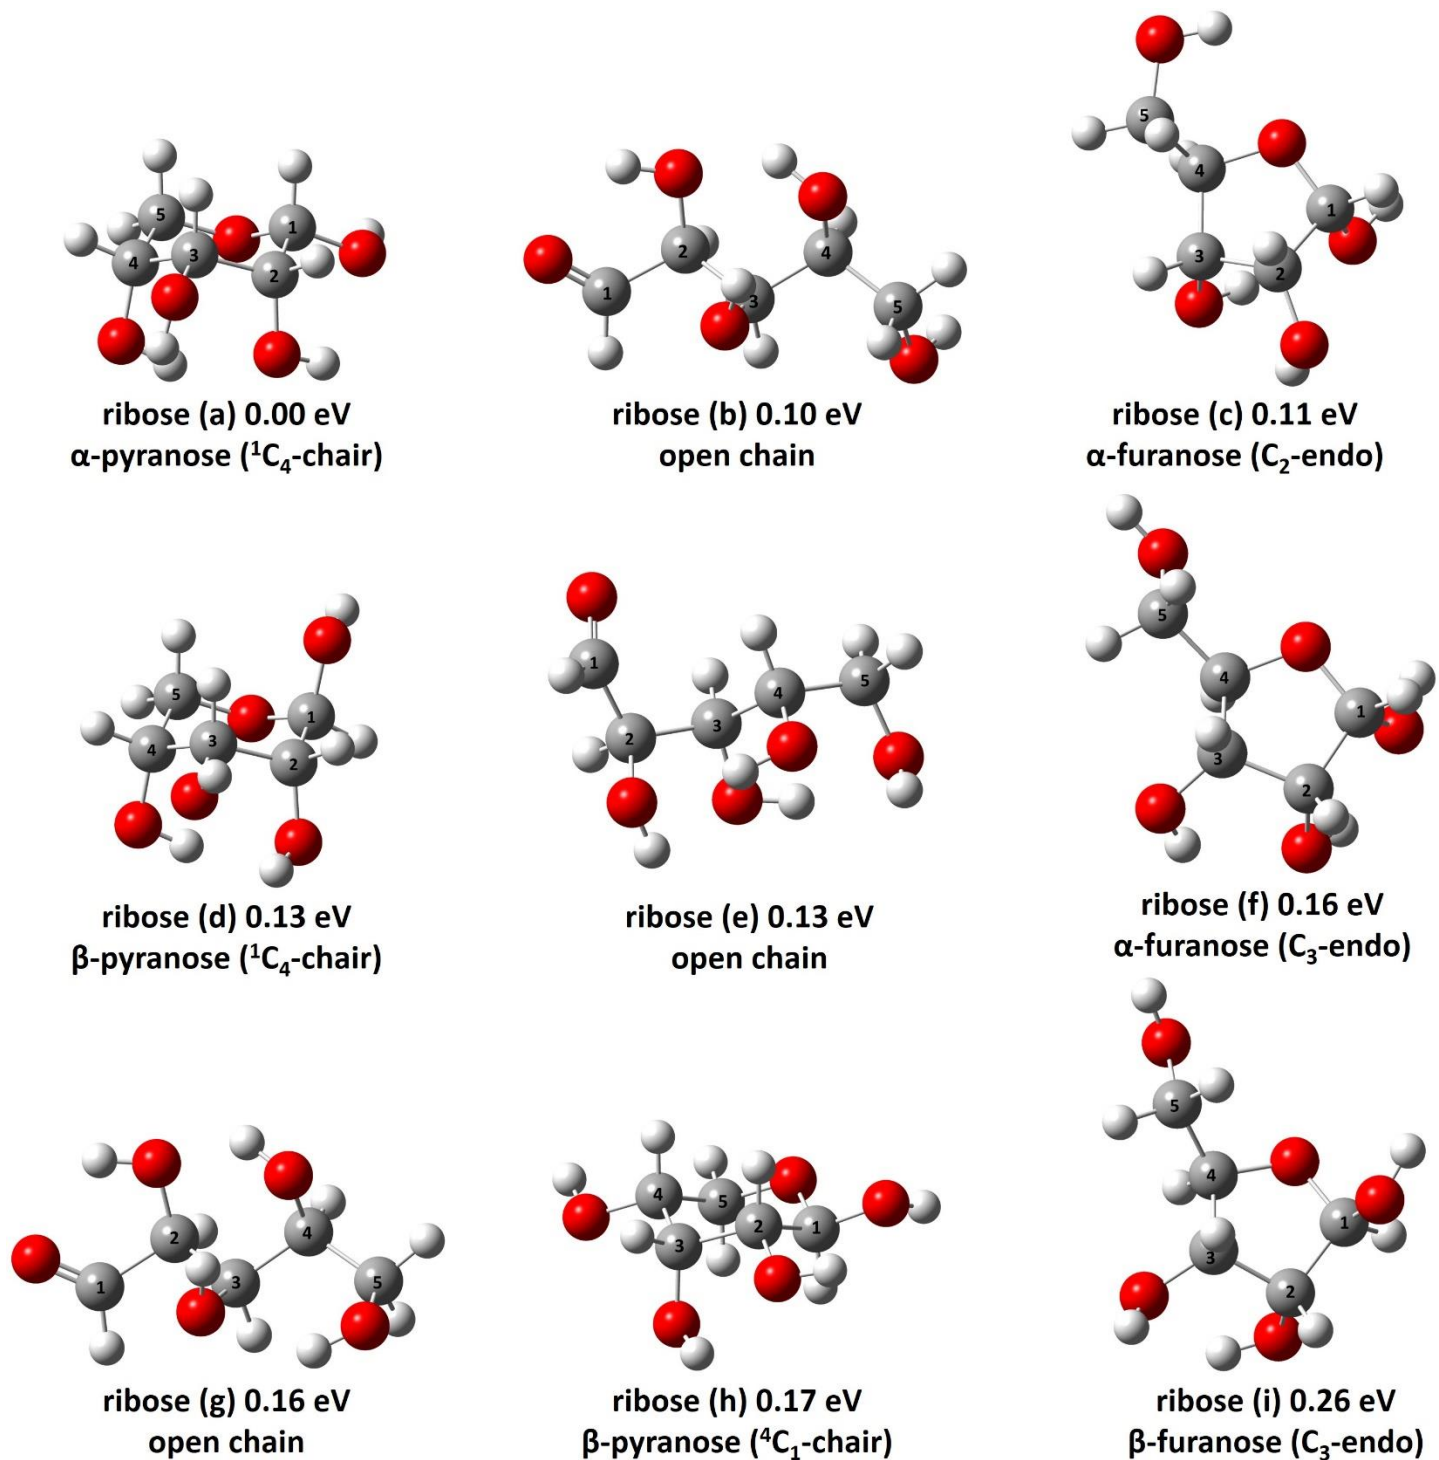

Figure S10 Optimized geometries of the typical low lying neutral isomers of ribose based on B3LYP/6-311++G(d,p) calculations. The relative energies and structural polymorphs are indicated. The C atom numberings are given. For open chain structures (1)C to (5)C is ordered from left to right. For both furanose and pyranose structures (1)C to (5)C is ordered from right to left in a clockwise direction. C atom numbering for open chain structures corresponds to that in the cyclic structures, for instance (1)C  $\Leftrightarrow$  (1)C.

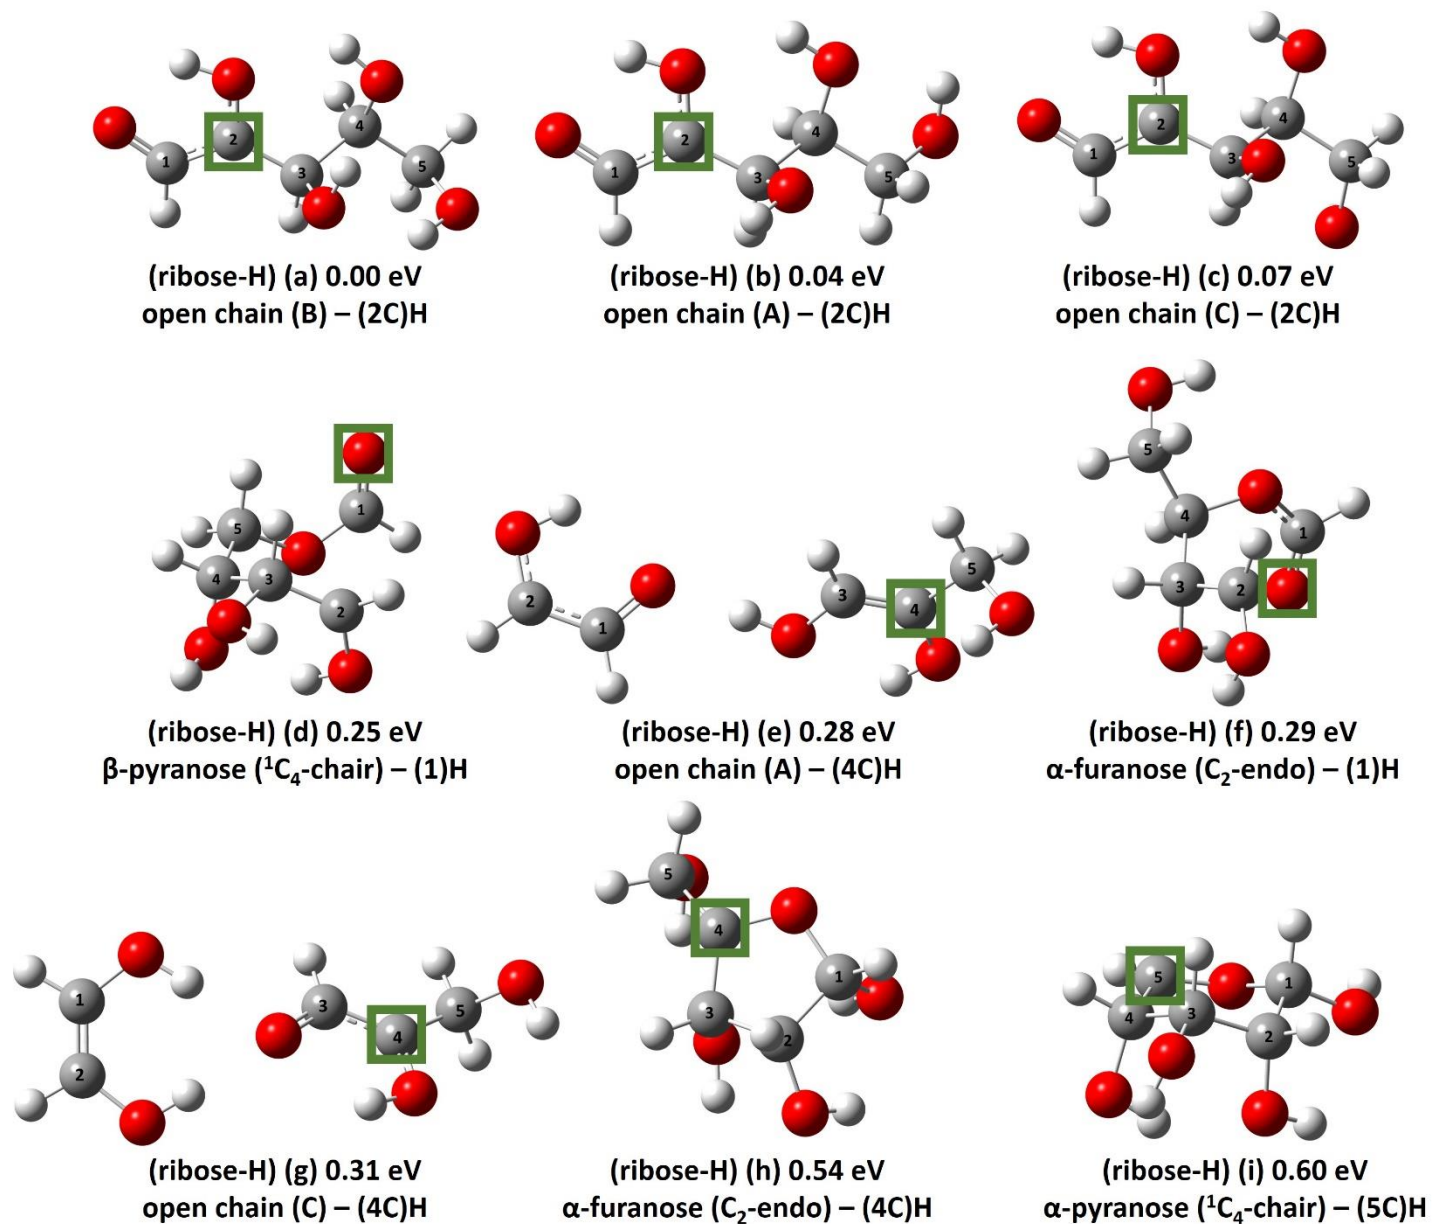

Figure S11 Optimized geometries of the typical low lying neutral isomers of (ribose-H) based on B3LYP/6-311++G(d,p) calculations. The relative energies and structural polymorphs are indicated. The green square indicates loss of hydrogen at the indicated position. The C atom numberings are given. For open chain structures (1)C to (5)C is ordered from left to right. For both furanose and pyranose structures (1)C to (5)C is ordered from right to left in a clockwise direction. C atom numbering for open chain structures corresponds to that in the cyclic structures, for instance (1)C  $\Leftrightarrow$  (1)C.

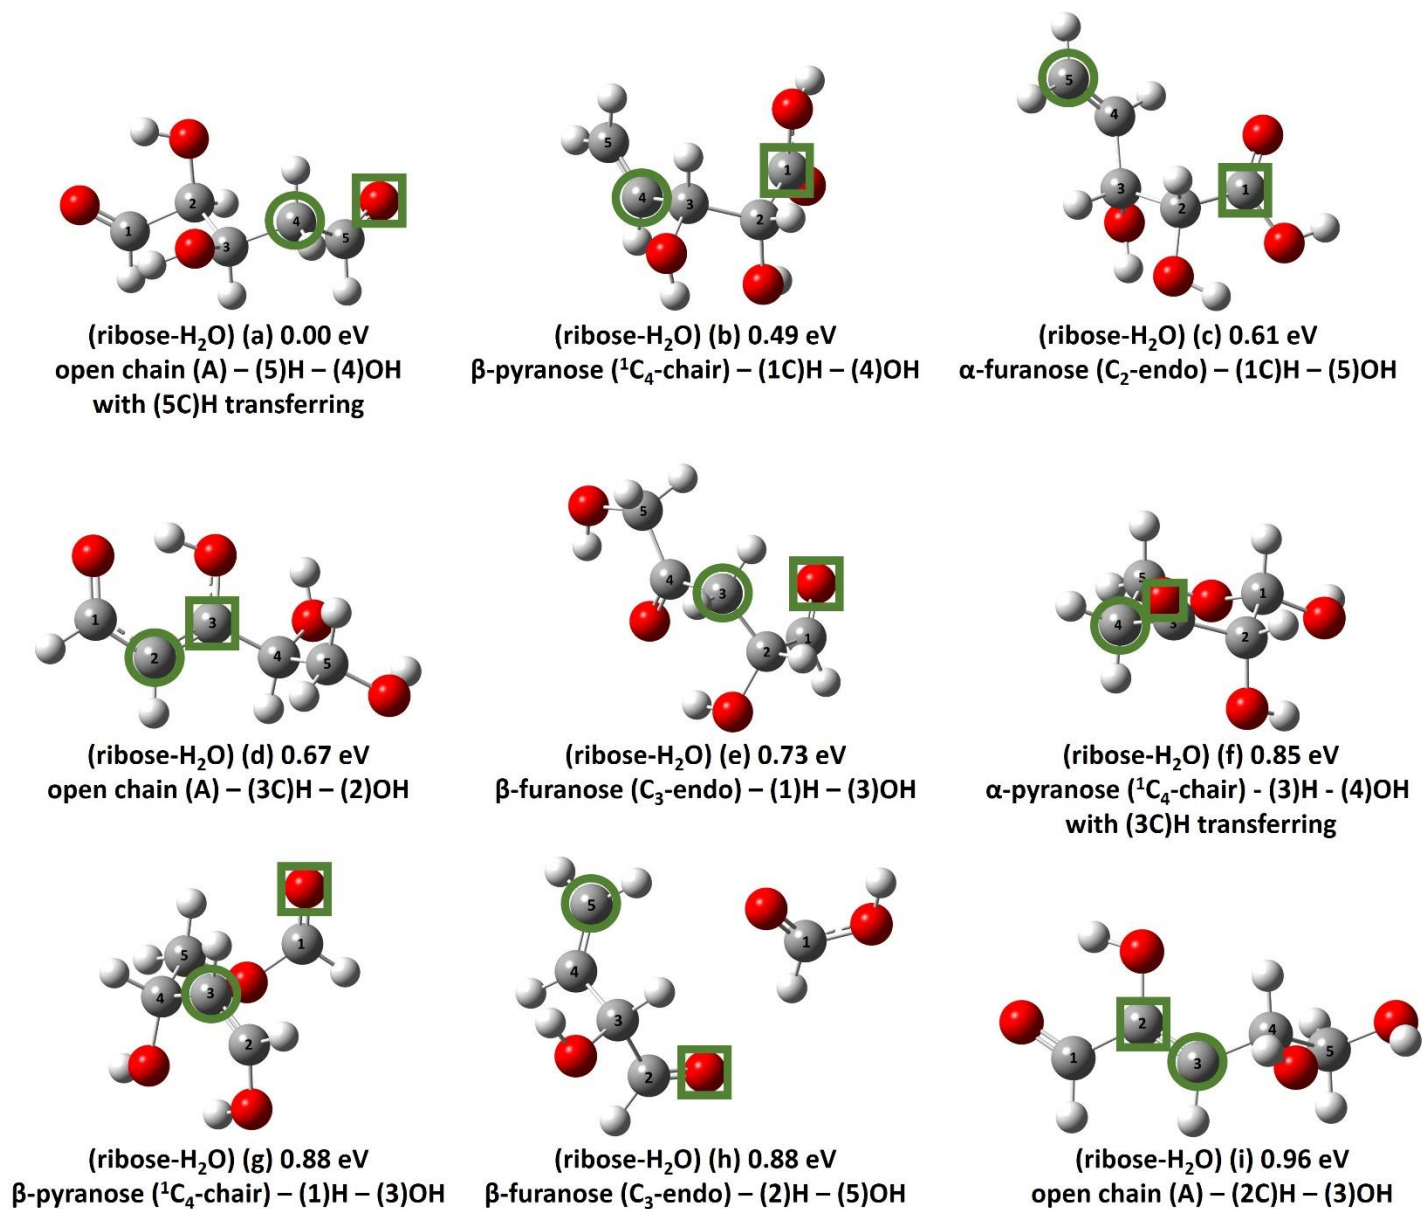

Figure S12 Optimized geometries of the typical low lying neutral isomers of (ribose-H<sub>2</sub>O) based on B3LYP/6-311++G(d,p) calculations. The relative energies and structural polymorphs are indicated. The green square indicates loss of hydrogen and the green circle indicates loss of an OH group at the marked positions. The C atom numberings are given. For open chain structures (1)C to (5)C is ordered from left to right. For both furanose and pyranose structures (1)C to (5)C is ordered from right to left in a clockwise direction. C atom numbering for open chain structures corresponds to that in the cyclic structures, for instance (1)C ↔ (1)C.

|                             |                                                                                   |                                                                                   |                                                                                    |                                                                                     |                                                                                     |
|-----------------------------|-----------------------------------------------------------------------------------|-----------------------------------------------------------------------------------|------------------------------------------------------------------------------------|-------------------------------------------------------------------------------------|-------------------------------------------------------------------------------------|
| Optimized neutral structure | 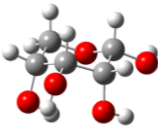 |  |  |  |  |
| Structural Polymorphism     | $\alpha$ -pyranose ( ${}^1C_4$ -chair)                                            | open chain                                                                        | $\alpha$ -furanose ( $C_2$ -endo)                                                  | $\beta$ -pyranose ( ${}^1C_4$ -chair)                                               | open chain                                                                          |
| $\Delta E$ (eV)             | 0.00                                                                              | 0.10                                                                              | 0.11                                                                               | 0.13                                                                                | 0.13                                                                                |
| Optimized neutral structure |  |  |  |  |  |
| Structural Polymorphism     | $\alpha$ -furanose ( $C_3$ -endo)                                                 | open chain                                                                        | $\beta$ -pyranose ( ${}^4C_1$ -chair)                                              | $\beta$ -furanose ( $C_3$ -endo)                                                    | $\alpha$ -pyranose ( ${}^4C_1$ -chair)                                              |
| $\Delta E$ (eV)             | 0.16                                                                              | 0.16                                                                              | 0.17                                                                               | 0.26                                                                                | 0.27                                                                                |
| Optimized neutral structure |  |  |  |  |                                                                                     |
| Structural Polymorphism     | open chain                                                                        | open chain                                                                        | $\beta$ -furanose ( $C_2$ -endo)                                                   | open chain                                                                          |                                                                                     |
| $\Delta E$ (eV)             | 0.29                                                                              | 0.31                                                                              | 0.32                                                                               | 0.43                                                                                |                                                                                     |

Figure S13 Optimized geometries of the typical low lying neutral isomers of ribose based on B3LYP/6-311++G(d,p) calculations. The relative energies and structural polymorphs are indicated. The structural presentation is the same as those in the main text Figures 4-6 as well as SI Figures S10-12. For open chain structures (1)C to (5)C is ordered from left to right. For both furanose and pyranose structures (1)C to (5)C is ordered from right to left in a clockwise direction.

|                             |                                              |                                                |                                               |                                               |                                              |
|-----------------------------|----------------------------------------------|------------------------------------------------|-----------------------------------------------|-----------------------------------------------|----------------------------------------------|
| Optimized neutral structure |                                              |                                                |                                               |                                               |                                              |
| Structural Polymorphism     | open chain (B) - (2C)H                       | open chain (A) - (2C)H                         | open chain (C) - (2C)H                        | $\beta$ -pyranose ( ${}^1C_4$ -chair) - (1)H  | open chain (A) - (4C)H                       |
| $\Delta E$ (eV)             | 0.00                                         | 0.04                                           | 0.07                                          | 0.25                                          | 0.28                                         |
| Optimized neutral structure |                                              |                                                |                                               |                                               |                                              |
| Structural Polymorphism     | $\alpha$ -furanose ( $C_2$ -endo) - (1)H     | open chain (C) - (4C)H                         | $\alpha$ -furanose ( $C_2$ -endo) - (4C)H     | $\beta$ -furanose ( $C_3$ -endo) - (4C)H      | open chain (A) - (3)H                        |
| $\Delta E$ (eV)             | 0.29                                         | 0.31                                           | 0.54                                          | 0.56                                          | 0.57                                         |
| Optimized neutral structure |                                              |                                                |                                               |                                               |                                              |
| Structural Polymorphism     | open chain (C) - (3)H                        | $\alpha$ -pyranose ( ${}^1C_4$ -chair) - (5C)H | open chain (C) - (3C)H                        | open chain (B) - (4C)H                        | open chain (A) - (1C)H                       |
| $\Delta E$ (eV)             | 0.57                                         | 0.60                                           | 0.60                                          | 0.63                                          | 0.65                                         |
| Optimized neutral structure |                                              |                                                |                                               |                                               |                                              |
| Structural Polymorphism     | open chain (C) - (1C)H                       | open chain (C) - (C5)H                         | $\beta$ -pyranose ( ${}^1C_4$ -chair) - (5C)H | $\beta$ -pyranose ( ${}^1C_4$ -chair) - (1C)H | $\alpha$ -furanose ( $C_2$ -endo) - (1C)H    |
| $\Delta E$ (eV)             | 0.65                                         | 0.68                                           | 0.73                                          | 0.81                                          | 0.86                                         |
| Optimized neutral structure |                                              |                                                |                                               |                                               |                                              |
| Structural Polymorphism     | $\beta$ -pyranose ( ${}^1C_4$ -chair) - (2)H | $\beta$ -pyranose ( ${}^1C_4$ -chair) - (4)H   | $\alpha$ -pyranose ( ${}^1C_4$ -chair) - (2)H | $\alpha$ -pyranose ( ${}^1C_4$ -chair) - (1)H | $\alpha$ -furanose ( $C_2$ -endo) - (6C)H    |
| $\Delta E$ (eV)             | 0.86                                         | 0.87                                           | 0.91                                          | 0.92                                          | 0.94                                         |
| Optimized neutral structure |                                              |                                                |                                               |                                               |                                              |
| Structural Polymorphism     | $\alpha$ -furanose ( $C_2$ -endo) - (3)H     | $\alpha$ -pyranose ( ${}^1C_4$ -chair) - (4)H  | open chain (A) - (5)H                         | $\alpha$ -pyranose ( ${}^1C_4$ -chair) - (3)H | $\beta$ -pyranose ( ${}^1C_4$ -chair) - (4)H |
| $\Delta E$ (eV)             | 1.00                                         | 1.02                                           | 1.05                                          | 1.08                                          | 1.09                                         |



|                             |                                                                                   |                                                                                   |                                                                                   |                                                                                    |                                                                                     |
|-----------------------------|-----------------------------------------------------------------------------------|-----------------------------------------------------------------------------------|-----------------------------------------------------------------------------------|------------------------------------------------------------------------------------|-------------------------------------------------------------------------------------|
| Optimized neutral structure | 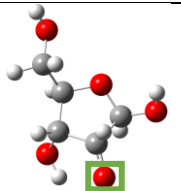  |   |   |   |   |
| Structural Polymorphism     | $\beta$ -furanose (C <sub>3</sub> – endo) - (2)H                                  | open chain (A) - (2)H                                                             | open chain (A) - (4)H                                                             | $\beta$ -furanose (C <sub>3</sub> – endo) - (5)H                                   | $\alpha$ -furanose (C <sub>2</sub> – endo) - (2)H                                   |
| $\Delta E$ (eV)             | 1.11                                                                              | 1.12                                                                              | 1.13                                                                              | 1.13                                                                               | 1.15                                                                                |
| Optimized neutral structure |  |  |  |  |  |
| Structural Polymorphism     | open chain (C) - (2)H                                                             | $\beta$ -furanose (C <sub>3</sub> – endo) - (1)H                                  | $\beta$ -furanose (C <sub>3</sub> – endo) - (1)H                                  | $\beta$ -furanose (C <sub>3</sub> – endo) - (3)H                                   | open chain (B) - (2)H                                                               |
| $\Delta E$ (eV)             | 1.16                                                                              | 1.17                                                                              | 1.20                                                                              | 1.20                                                                               | 1.24                                                                                |
| Optimized neutral structure |  |                                                                                   |                                                                                   |                                                                                    |                                                                                     |
| Structural Polymorphism     | open chain (C) - (3)H                                                             |                                                                                   |                                                                                   |                                                                                    |                                                                                     |
| $\Delta E$ (eV)             | 1.25                                                                              |                                                                                   |                                                                                   |                                                                                    |                                                                                     |

Figure S14 Optimized geometries of the typical low lying neutral isomers of (ribose-H) based on B3LYP/6-311++G(d,p) calculations. The relative energies and structural polymorphs are indicated. The green square indicates loss of hydrogen at the indicated position. The green labels indicate loss of hydrogen from carbon atom. The structural presentation is the same as those in the main text Figures 4-6 as well as SI Figures S10-12. For open chain structures (1)C to (5)C is ordered from left to right. For both furanose and pyranose structures (1)C to (5)C is ordered from right to left in a clockwise direction.

|                             |                                                                               |                                                       |                                                       |                                                       |                                                       |
|-----------------------------|-------------------------------------------------------------------------------|-------------------------------------------------------|-------------------------------------------------------|-------------------------------------------------------|-------------------------------------------------------|
| Optimized neutral structure |                                                                               |                                                       |                                                       |                                                       |                                                       |
| Structural Polymorphism     | open chain (A) – [(5)H + (4)OH] with (5C)H transferring                       | $\beta$ -pyranose ( ${}^1C_4$ -chair) – (1C)H – (4)OH | $\alpha$ -furanose ( $C_2$ – endo) – (1C)H – (5)OH    | open chain (A) – (3C)H – (2)OH                        | $\beta$ -furanose ( $C_3$ – endo) – (1)H – (3)OH      |
| $\Delta E$ (eV)             | 0.00                                                                          | 0.49                                                  | 0.61                                                  | 0.67                                                  | 0.73                                                  |
| Optimized neutral structure |                                                                               |                                                       |                                                       |                                                       |                                                       |
| Structural Polymorphism     | $\alpha$ -pyranose ( ${}^1C_4$ -chair) – (3)H – (4)OH with (3C)H transferring | $\beta$ -pyranose ( ${}^1C_4$ -chair) – (1)H – (3)OH  | $\beta$ -furanose ( $C_3$ – endo) – (5)OH – (2)H      | open chain (A) – (5)H – (4)OH with (5C)H transferring | $\alpha$ -furanose ( $C_2$ – endo) – (1)H – (3)OH     |
| $\Delta E$ (eV)             | 0.85                                                                          | 0.88                                                  | 0.88                                                  | 0.89                                                  | 0.95                                                  |
| Optimized neutral structure |                                                                               |                                                       |                                                       |                                                       |                                                       |
| Structural Polymorphism     | open chain (A) – (2C)H – (3)OH                                                | open chain (B) – (2C)H – (3)OH                        | open chain (C) – (4)H – (3)OH                         | $\alpha$ -pyranose ( ${}^1C_4$ -chair) – (2)H – (1)OH | $\alpha$ -pyranose ( ${}^1C_4$ -chair) – (3)H – (2)OH |
| $\Delta E$ (eV)             | 0.96                                                                          | 0.99                                                  | 1.01                                                  | 1.02                                                  | 1.04                                                  |
| Optimized neutral structure |                                                                               |                                                       |                                                       |                                                       |                                                       |
| Structural Polymorphism     | $\beta$ -furanose ( $C_3$ – endo) – (1)H – (2)OH                              | $\beta$ -furanose ( $C_3$ – endo) – (5C)H – (2/3)OH   | open chain (C) – (2C)H – (3)OH                        | open chain (A) – [(4)H + (5)OH]                       | $\alpha$ -pyranose ( ${}^1C_4$ -chair) – (1)H – (3)OH |
| $\Delta E$ (eV)             | 1.06                                                                          | 1.08                                                  | 1.08                                                  | 1.11                                                  | 1.14                                                  |
| Optimized neutral structure |                                                                               |                                                       |                                                       |                                                       |                                                       |
| Structural Polymorphism     | $\beta$ -furanose ( $C_3$ – endo) – (1)H – (2)OH                              | open chain (A) – [(4)H + (2)OH]                       | open chain (C) – (2)H – (3)OH with (2C)H transferring | open chain (A) – [(2)H + (3)OH]                       | $\alpha$ -furanose ( $C_2$ – endo) – (1C)H – (2)OH    |
| $\Delta E$ (eV)             | 1.16                                                                          | 1.16                                                  | 1.17                                                  | 1.18                                                  | 1.19                                                  |

|                             |                                                       |                                                    |                                                        |                                                     |                                                                          |
|-----------------------------|-------------------------------------------------------|----------------------------------------------------|--------------------------------------------------------|-----------------------------------------------------|--------------------------------------------------------------------------|
| Optimized neutral structure |                                                       |                                                    |                                                        |                                                     |                                                                          |
| Structural Polymorphism     | open chain (C) - (3)H - (4)OH                         | $\alpha$ -furanose ( $C_2$ - endo) - (4C)H - (5)OH | $\alpha$ -pyranose ( ${}^1C_4$ -chair) - (5C)H - (4)OH | open chain (A) - (1C)H - (3)OH                      | $\beta$ -pyranose ( ${}^1C_4$ -chair) - (3C)H - (4)OH                    |
| $\Delta E$ (eV)             | 1.21                                                  | 1.22                                               | 1.24                                                   | 1.27                                                | 1.29                                                                     |
| Optimized neutral structure |                                                       |                                                    |                                                        |                                                     |                                                                          |
| Structural Polymorphism     | open chain (A) - [(4)H + (2)OH]                       | $\alpha$ -furanose ( $C_2$ - endo) - (4C)H - (3)OH | $\beta$ -pyranose ( ${}^1C_4$ -chair) - (5C)H - (4)OH  | $\beta$ -furanose ( $C_3$ - endo) - (4C)H - (5)OH   | $\beta$ -furanose ( $C_3$ - endo) - (4C)H - (3)OH                        |
| $\Delta E$ (eV)             | 1.30                                                  | 1.30                                               | 1.33                                                   | 1.33                                                | 1.38                                                                     |
| Optimized neutral structure |                                                       |                                                    |                                                        |                                                     |                                                                          |
| Structural Polymorphism     | open chain (C) - (1C)H - (3)OH                        | open chain (A) - (1C)H - (2)OH                     | $\alpha$ -furanose ( $C_2$ - endo) - (4C)H - (2)OH     | open chain (A) - (4C)H - (5)OH                      | $\beta$ -furanose ( $C_3$ - endo) - (5)H - (1)OH with (5C)H transferring |
| $\Delta E$ (eV)             | 1.36                                                  | 1.39                                               | 1.39                                                   | 1.39                                                | 1.40                                                                     |
| Optimized neutral structure |                                                       |                                                    |                                                        |                                                     |                                                                          |
| Structural Polymorphism     | $\alpha$ -pyranose ( ${}^1C_4$ -chair) - (1)H - (2)OH | open chain (C) - (1C)H - (2)OH                     | open chain (A) - (3)H - (5)OH                          | open chain (C) - (4C)H - (5)OH                      | $\beta$ -furanose ( $C_3$ - endo) - (1)H - (5)OH                         |
| $\Delta E$ (eV)             | 1.40                                                  | 1.43                                               | 1.47                                                   | 1.48                                                | 1.51                                                                     |
| Optimized neutral structure |                                                       |                                                    |                                                        |                                                     |                                                                          |
| Structural Polymorphism     | $\alpha$ -pyranose ( ${}^1C_4$ -chair) - (2)H - (4)OH | $\alpha$ -furanose ( $C_2$ - endo) - (1)H - (5)OH  | open chain (C) - (3)H - (5)OH                          | $\alpha$ -furanose ( $C_2$ - endo) - [(1)H + (5)OH] | $\alpha$ -pyranose ( ${}^1C_4$ -chair) - (4)H - (2)OH                    |
| $\Delta E$ (eV)             | 1.51                                                  | 1.57                                               | 1.57                                                   | 1.64                                                | 1.66                                                                     |

|                             |                                                         |                                                        |                                                         |                                                      |                                                       |
|-----------------------------|---------------------------------------------------------|--------------------------------------------------------|---------------------------------------------------------|------------------------------------------------------|-------------------------------------------------------|
| Optimized neutral structure |                                                         |                                                        |                                                         |                                                      |                                                       |
| Structural Polymorphism     | open chain (A) - (3)H - (4)OH                           | $\beta$ -pyranose ( ${}^1C_4$ -chair) - (2)H - (4)OH   | open chain (A) - (5)H - (3)OH                           | open chain (A) - [(5)H + (3)OH]                      | $\alpha$ -furanose ( $C_2$ -endo) - (1)H - (5)OH      |
| $\Delta E$ (eV)             | 1.66                                                    | 1.71                                                   | 1.75                                                    | 1.75                                                 | 1.78                                                  |
| Optimized neutral structure |                                                         |                                                        |                                                         |                                                      |                                                       |
| Structural Polymorphism     | $\beta$ -pyranose ( ${}^1C_4$ -chair) - (5C)H - (1/4)OH | open chain (C) - (3)H - (4)OH                          | $\beta$ -pyranose ( ${}^1C_4$ -chair) - (5C)H - (2)OH   | $\alpha$ -furanose ( $C_2$ -endo) - (3)H - (1)OH     | $\alpha$ -pyranose ( ${}^1C_4$ -chair) - (4)H - (3)OH |
| $\Delta E$ (eV)             | 1.83                                                    | 1.87                                                   | 1.92                                                    | 1.92                                                 | 1.94                                                  |
| Optimized neutral structure |                                                         |                                                        |                                                         |                                                      |                                                       |
| Structural Polymorphism     | $\beta$ -pyranose ( ${}^1C_4$ -chair) - (2)H - (3)OH    | open chain (C) - (4C)H - (3)OH                         | $\beta$ -pyranose ( ${}^1C_4$ -chair) - (3)H - (2)OH    | $\beta$ -pyranose ( ${}^1C_4$ -chair) - (2)H - (1)OH | open chain (A) - [(2)H + (4)OH]                       |
| $\Delta E$ (eV)             | 1.95                                                    | 1.95                                                   | 1.95                                                    | 1.95                                                 | 1.96                                                  |
| Optimized neutral structure |                                                         |                                                        |                                                         |                                                      |                                                       |
| Structural Polymorphism     | open chain (C) - (2)H - (4)OH                           | $\beta$ -pyranose ( ${}^1C_4$ -chair) - (1)H - (2)OH   | $\beta$ -pyranose ( ${}^1C_4$ -chair) - (5C)H - (3/4)OH | $\beta$ -furanose ( $C_3$ -endo) - (3)H - (1)OH      | $\alpha$ -pyranose ( ${}^1C_4$ -chair) - (2)H - (3)OH |
| $\Delta E$ (eV)             | 1.97                                                    | 1.98                                                   | 1.99                                                    | 2.00                                                 | 2.00                                                  |
| Optimized neutral structure |                                                         |                                                        |                                                         |                                                      |                                                       |
| Structural Polymorphism     | open chain (A) - (1C)H - (4)OH                          | $\alpha$ -furanose ( $C_2$ -endo) - (3)H - (2)OH       | $\alpha$ -pyranose ( ${}^1C_4$ -chair) - (1)H - (4)OH   | $\beta$ -furanose ( $C_3$ -endo) - (1)H - (3)OH      | open chain (C) - (4)H - (5)OH                         |
| $\Delta E$ (eV)             | 2.02                                                    | 2.03                                                   | 2.03                                                    | 2.04                                                 | 2.04                                                  |
| Optimized neutral structure |                                                         |                                                        |                                                         |                                                      |                                                       |
| Structural Polymorphism     | open chain (A) - (3)OH - (4)H                           | $\alpha$ -pyranose ( ${}^1C_4$ -chair) - (5C)H - (3)OH | open chain (A) - [(4)H + (5)OH]                         | open chain (C) - (3)H - (2)OH                        | $\beta$ -furanose ( $C_3$ -endo) - (3)H - (2)OH       |

|                             |                                                          |                                                            |                                                             |                                                                         |                                                                                   |
|-----------------------------|----------------------------------------------------------|------------------------------------------------------------|-------------------------------------------------------------|-------------------------------------------------------------------------|-----------------------------------------------------------------------------------|
| $\Delta E$ (eV)             | 2.05                                                     | 2.06                                                       | 2.07                                                        | 2.07                                                                    | 2.07                                                                              |
| Optimized neutral structure |                                                          |                                                            |                                                             |                                                                         |                                                                                   |
| Structural Polymorphism     | $\beta$ -furanose (C <sub>3</sub> – endo) - (2)H - (3)OH | $\alpha$ -furanose (C <sub>2</sub> – endo) - (1)H - (2)OH  | $\alpha$ -furanose (C <sub>2</sub> – endo) - (2)H - (1)OH   | $\beta$ -pyranose ( <sup>1</sup> C <sub>4</sub> -chair) - (1C)H - (3)OH | $\beta$ -furanose (C <sub>3</sub> – endo) - (1)H - (5)OH                          |
| $\Delta E$ (eV)             | 2.07                                                     | 2.09                                                       | 2.09                                                        | 2.18                                                                    | 2.18                                                                              |
| Optimized neutral structure |                                                          |                                                            |                                                             |                                                                         |                                                                                   |
| Structural Polymorphism     | $\beta$ -furanose (C <sub>3</sub> – endo) - (2)H - (1)OH | $\beta$ -furanose (C <sub>3</sub> – endo) - (2)H - (5)OH   | $\alpha$ -furanose (C <sub>2</sub> – endo) - [(2)H + (5)OH] | $\alpha$ -furanose (C <sub>2</sub> – endo) - (2)H - (5)OH               | open chain (A) - (5)H - (2)OH                                                     |
| $\Delta E$ (eV)             | 2.19                                                     | 2.24                                                       | 2.31                                                        | 2.31                                                                    | 2.33                                                                              |
| Optimized neutral structure |                                                          |                                                            |                                                             |                                                                         |                                                                                   |
| Structural Polymorphism     | $\beta$ -furanose (C <sub>3</sub> – endo) - (1)H - (3)OH | open chain (A) - [(5)H + (2)OH]                            | $\alpha$ -furanose (C <sub>2</sub> – endo) - (1C)H - (3)OH  | open chain (A) - (3)H - (2)OH                                           | open chain (C) - (3)H - (2)OH                                                     |
| $\Delta E$ (eV)             | 2.50                                                     | 2.51                                                       | 3.07                                                        | 3.16                                                                    | 3.21                                                                              |
| Optimized neutral structure |                                                          |                                                            |                                                             |                                                                         |                                                                                   |
| Structural Polymorphism     | $\beta$ -furanose (C <sub>3</sub> – endo) - (5)H - (2)OH | $\alpha$ -furanose (C <sub>2</sub> – endo) - (1C)H - (1)OH | $\alpha$ -furanose (C <sub>2</sub> – endo) - (4C)H - (1)OH  | $\beta$ -pyranose ( <sup>1</sup> C <sub>4</sub> -chair) - (1C)H - (1)OH | $\alpha$ -furanose (C <sub>2</sub> – endo) - (5)OH - (2)H with (1)OH transferring |
| $\Delta E$ (eV)             | 3.27                                                     | 3.45                                                       | 3.55                                                        | 3.85                                                                    | 4.13                                                                              |

Figure S15 Optimized geometries of the typical low lying neutral isomers of (ribose-H<sub>2</sub>O) based on B3LYP/6-311++G(d,p) calculations. The relative energies and structural polymorphs are indicated. The green square indicates loss of hydrogen and the green circle indicates loss of an OH group. The structural presentation is the same as those in the main text Figures 4-6 as well as SI Figures S10-12. For open chain structures (1)C to (5)C is ordered from left to right. For both furanose and pyranose structures (1)C to (5)C is ordered from right to left in a clockwise direction.

|                             |                                                                                   |                                                                                   |                                                                                    |                                                                                     |                                                                                     |
|-----------------------------|-----------------------------------------------------------------------------------|-----------------------------------------------------------------------------------|------------------------------------------------------------------------------------|-------------------------------------------------------------------------------------|-------------------------------------------------------------------------------------|
| Optimized anionic structure | 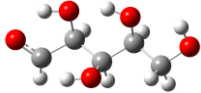 |  |  |  |  |
| Structural polymorphism     | ribose <sup>-</sup> (A)<br>open chain                                             | ribose <sup>-</sup> (B)<br>open chain                                             | ribose <sup>-</sup> (C)<br>open chain                                              | ribose <sup>-</sup> (D)<br>open chain                                               | ribose <sup>-</sup> (E)<br>β-pyranose ( <sup>1</sup> C <sub>4</sub> -<br>chair)     |
| ΔE                          | 0.00                                                                              | 0.01                                                                              | 0.19                                                                               | 0.29                                                                                | 0.64                                                                                |
| VDE(eV)                     | 1.48                                                                              | 1.57                                                                              | 1.37                                                                               | 0.92                                                                                | -0.52                                                                               |
| Optimized anionic structure |  |  |  |                                                                                     |                                                                                     |
| Structural polymorphism     | ribose <sup>-</sup> (F)<br>α-pyranose ( <sup>1</sup> C <sub>4</sub> -<br>chair)   | ribose <sup>-</sup> (G)<br>α-furanose (C <sub>2</sub> -<br>endo)                  | ribose <sup>-</sup> (H)<br>β-furanose (C <sub>3</sub> -<br>endo)                   |                                                                                     |                                                                                     |
| ΔE                          | 0.66                                                                              | 0.78                                                                              | 0.79                                                                               |                                                                                     |                                                                                     |
| VDE(eV)                     | -0.45                                                                             | -0.34                                                                             | -0.21                                                                              |                                                                                     |                                                                                     |

Figure S16 Optimized geometries of the typical low lying anionic isomers of ribose<sup>-</sup> based on M062X/6-311++G(d,p) calculations. The relative energies and structural polymorphs are indicated. The isomers have nearly identical structures with respect to the corresponding isomers optimized from B3LYP/6-311++G(d,p) level of theory.

|                             |                                                                                        |                                                                         |                                                                                        |                                                       |                                                                                        |
|-----------------------------|----------------------------------------------------------------------------------------|-------------------------------------------------------------------------|----------------------------------------------------------------------------------------|-------------------------------------------------------|----------------------------------------------------------------------------------------|
| Optimized anionic structure |                                                                                        |                                                                         |                                                                                        |                                                       |                                                                                        |
| Structural polymorphism     | (ribose-H) <sup>-</sup> (A)<br>open chain (C) – (4C)H                                  | (ribose-H) <sup>-</sup> (B)<br>open chain (C) – (3)H                    | (ribose-H) <sup>-</sup> (C)<br>α-pyranose ( <sup>1</sup> C <sub>4</sub> -chair) – (2)H | (ribose-H) <sup>-</sup> (D)<br>open chain (A) – (2)H  | (ribose-H) <sup>-</sup> (E)<br>open chain (B) – (2C)H                                  |
| ΔE                          | 0.38                                                                                   | 0.19                                                                    | 0.00                                                                                   | 0.30                                                  | 0.37                                                                                   |
| VDE(eV)                     | 3.51                                                                                   | 4.63                                                                    | 3.87                                                                                   | 4.17                                                  | 2.73                                                                                   |
| Optimized anionic structure |                                                                                        |                                                                         |                                                                                        |                                                       |                                                                                        |
| Structural polymorphism     | (ribose-H) <sup>-</sup> (F)<br>α-furanose (C <sub>2</sub> -endo) – (1)H                | (ribose-H) <sup>-</sup> (G)<br>α-furanose (C <sub>2</sub> -endo) – (3)H | (ribose-H) <sup>-</sup> (H)<br>open chain (A) – (2C)H                                  | (ribose-H) <sup>-</sup> (I)<br>open chain (B) – (2)H  | (ribose-H) <sup>-</sup> (J)<br>α-pyranose ( <sup>1</sup> C <sub>4</sub> -chair) – (1)H |
| ΔE                          | 0.14                                                                                   | 0.00                                                                    | 0.37                                                                                   | 0.34                                                  | 0.17                                                                                   |
| VDE(eV)                     | 3.86                                                                                   | 4.16                                                                    | 2.65                                                                                   | 4.11                                                  | 3.75                                                                                   |
| Optimized anionic structure |                                                                                        |                                                                         |                                                                                        |                                                       |                                                                                        |
| Structural polymorphism     | (ribose-H) <sup>-</sup> (K)<br>β-pyranose ( <sup>1</sup> C <sub>4</sub> -chair) – (4)H | (ribose-H) <sup>-</sup> (L)<br>open chain (A) – (4C)H                   | (ribose-H) <sup>-</sup> (M)<br>open chain (C) – (2C)H                                  | (ribose-H) <sup>-</sup> (N)<br>open chain (D) – (2C)H |                                                                                        |
| ΔE                          | 0.29                                                                                   | 0.36                                                                    | 0.54                                                                                   | 0.94                                                  |                                                                                        |
| VDE(eV)                     | 3.48                                                                                   | 3.53                                                                    | 2.55                                                                                   | 2.25                                                  |                                                                                        |

Figure S17 Optimized geometries of the typical low lying anionic isomers of (ribose-H)<sup>-</sup> based on M062X/6-311++G(d,p) calculations. The relative energies and structural polymorphs are indicated. The green square indicates the position from which the H atom of ribose is removed.

|                             |                                                                                                      |                                                                                |                                                                                |                                                                                |                                                                                                                     |
|-----------------------------|------------------------------------------------------------------------------------------------------|--------------------------------------------------------------------------------|--------------------------------------------------------------------------------|--------------------------------------------------------------------------------|---------------------------------------------------------------------------------------------------------------------|
| Optimized anionic structure |                                                                                                      |                                                                                |                                                                                |                                                                                |                                                                                                                     |
| Structural polymorphism     | (ribose-H <sub>2</sub> O) <sup>-</sup> (A)<br>open chain (C) –<br>(2)H– (4)OH                        | (ribose-H <sub>2</sub> O) <sup>-</sup> (B)<br>open chain (A) –<br>(2)H– (4)OH  | (ribose-H <sub>2</sub> O) <sup>-</sup> (C)<br>open chain (C) –<br>(4C)H– (5)OH | (ribose-H <sub>2</sub> O) <sup>-</sup> (D)<br>open chain (A) –<br>(2C)H– (3)OH | (ribose-H <sub>2</sub> O) <sup>-</sup> (E)<br>open chain (C) –<br>(2C)H– (3)OH                                      |
| ΔE                          | 0.03                                                                                                 | 0.00                                                                           | 0.26                                                                           | 0.13                                                                           | 0.13                                                                                                                |
| VDE(eV)                     | 3.17                                                                                                 | 3.03                                                                           | 2.13                                                                           | 1.41                                                                           | 1.51                                                                                                                |
| Optimized anionic structure |                                                                                                      |                                                                                |                                                                                |                                                                                |                                                                                                                     |
| Structural polymorphism     | (ribose-H <sub>2</sub> O) <sup>-</sup> (F)<br>open chain (A) –<br>(4C)H– (5)OH                       | (ribose-H <sub>2</sub> O) <sup>-</sup> (G)<br>open chain (B) –<br>(2C)H– (3)OH | (ribose-H <sub>2</sub> O) <sup>-</sup> (H)<br>open chain (A) –<br>(4)H– (2)OH  | (ribose-H <sub>2</sub> O) <sup>-</sup> (I)<br>open chain (A) –<br>(3)H– (2)OH  | (ribose-H <sub>2</sub> O) <sup>-</sup> (J)<br>α-pyranose ( <sup>1</sup> C <sub>4</sub> -<br>chair) – (1)H–<br>(2)OH |
| ΔE                          | 0.37                                                                                                 | 0.19                                                                           | 0.71                                                                           | 0.81                                                                           | 1.09                                                                                                                |
| VDE(eV)                     | 2.02                                                                                                 | 1.26                                                                           | 4.11                                                                           | 3.89                                                                           | 3.05                                                                                                                |
| Optimized anionic structure |                                                                                                      |                                                                                |                                                                                |                                                                                |                                                                                                                     |
| Structural polymorphism     | (ribose-H <sub>2</sub> O) <sup>-</sup> (K)<br>β-furanose (C <sub>3</sub> -<br>endo) – (2)H–<br>(5)OH |                                                                                |                                                                                |                                                                                |                                                                                                                     |
| ΔE                          | 1.27                                                                                                 |                                                                                |                                                                                |                                                                                |                                                                                                                     |
| VDE(eV)                     | 1.32                                                                                                 |                                                                                |                                                                                |                                                                                |                                                                                                                     |

Figure S18 Optimized geometries of the typical low lying anionic isomers of (ribose-H<sub>2</sub>O)<sup>-</sup> based on M062X/6-311++G(d,p) calculations. The relative energies and structural polymorphs are indicated. The green square indicates the position from which the H atom is removed and the green circle indicates the position from which an OH group is removed.



(ribose-H)<sup>-</sup>

|                                                                  |                             |
|------------------------------------------------------------------|-----------------------------|
| $\text{ribose}^- \longrightarrow \text{(ribose-H)}^- + \text{H}$ |                             |
| Isomers of (ribose-H) <sup>-</sup>                               | $\Delta\text{H}$ (kcal/mol) |
| (A)                                                              | 28.35                       |
| (B)                                                              | 29.90                       |
| (C)                                                              | 17.07                       |
| (E)                                                              | 37.84                       |

(ribose-H)<sup>-</sup>

|                                                                                                                          |                             |
|--------------------------------------------------------------------------------------------------------------------------|-----------------------------|
| $\text{ribose}^0 \longrightarrow \text{(ribose-H)}^0 + \text{H} \xrightarrow{\text{e}^-} \text{(ribose-H)}^- + \text{H}$ |                             |
| Isomers of (ribose-H) <sup>-</sup>                                                                                       | $\Delta\text{H}$ (kcal/mol) |
| (A)                                                                                                                      | 19.22                       |
| (B)                                                                                                                      | 20.76                       |
| (C)                                                                                                                      | 25.32                       |
| (E)                                                                                                                      | 23.50                       |

Figure S19 (a) Calculated  $\Delta\text{H}$  values for different possible pathways for generating specific (ribose-H)<sup>-</sup> anionic isomers. Red color indicates an anionic mechanism. Black color indicates a neutral mechanism. When we calculate the  $\Delta\text{H}$  values for generating every specific isomer, the reactant that has the most similar structure to that of final product is chosen.

| (ribose-H <sub>2</sub> O) <sup>-</sup>                                                                                                    |               |
|-------------------------------------------------------------------------------------------------------------------------------------------|---------------|
| ribose <sup>-</sup> → (ribose-OH) <sup>-</sup> + OH → (ribose-H <sub>2</sub> O) <sup>-</sup> + H + OH                                     |               |
| ribose <sup>-</sup> → (ribose-H) <sup>-</sup> + H → (ribose-OH) <sup>-</sup> + O + H → (ribose-H <sub>2</sub> O) <sup>-</sup> + H + O + H |               |
| ribose <sup>-</sup> → (ribose-H <sub>2</sub> O) <sup>-</sup> + H <sub>2</sub> O                                                           |               |
| Isomers of (ribose-H <sub>2</sub> O) <sup>-</sup>                                                                                         | ΔH (kcal/mol) |
|                                                                                                                                           | 96.07         |
| (C)                                                                                                                                       | 261.87        |
|                                                                                                                                           | <b>-18.70</b> |
| (D)                                                                                                                                       | 101.87        |
|                                                                                                                                           | 267.66        |
|                                                                                                                                           | <b>-12.91</b> |

| ribose <sup>0</sup> → (ribose-OH) <sup>0</sup> + OH → (ribose-H <sub>2</sub> O) <sup>0</sup> + H + OH $\xrightarrow{e^-}$ (ribose-H <sub>2</sub> O) <sup>-</sup> + H + OH                                        |               |
|------------------------------------------------------------------------------------------------------------------------------------------------------------------------------------------------------------------|---------------|
| ribose <sup>0</sup> → (ribose-H) <sup>0</sup> + H → (ribose-OH) <sup>0</sup> + O + H → (ribose-H <sub>2</sub> O) <sup>0</sup> + H + O + H $\xrightarrow{e^-}$ (ribose-H <sub>2</sub> O) <sup>-</sup> + H + O + H |               |
| ribose <sup>0</sup> → (ribose-H <sub>2</sub> O) <sup>-</sup> + H <sub>2</sub> O $\xrightarrow{e^-}$ (ribose-H <sub>2</sub> O) <sup>-</sup> + H <sub>2</sub> O                                                    |               |
| Isomers of (ribose-H <sub>2</sub> O) <sup>-</sup>                                                                                                                                                                | ΔH (kcal/mol) |
|                                                                                                                                                                                                                  | 86.94         |
| (C)                                                                                                                                                                                                              | 252.73        |
|                                                                                                                                                                                                                  | <b>-27.84</b> |
| (D)                                                                                                                                                                                                              | 84.14         |
|                                                                                                                                                                                                                  | 249.94        |
|                                                                                                                                                                                                                  | <b>-30.63</b> |

Figure S19 (b) Calculated ΔH values for different possible pathways for generating specific (ribose-H<sub>2</sub>O)<sup>-</sup> anionic isomers. Red color indicates an anionic mechanism. Black color indicates a neutral mechanism. When we calculate the ΔH values for generating every specific isomer, the reactant that has the most similar structure to that of final product is chosen.

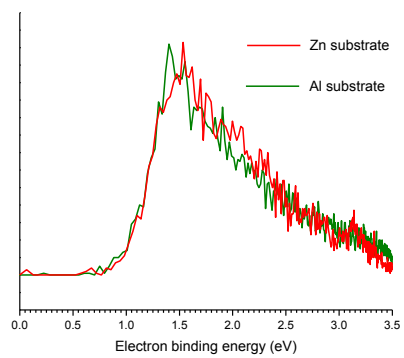

Figure S20 Photoelectron spectrum of (ribose-H<sub>2</sub>O)<sup>-</sup> recording using 355 nm photons with sample (D-ribose/DCM) spayed on different absorption substrates.

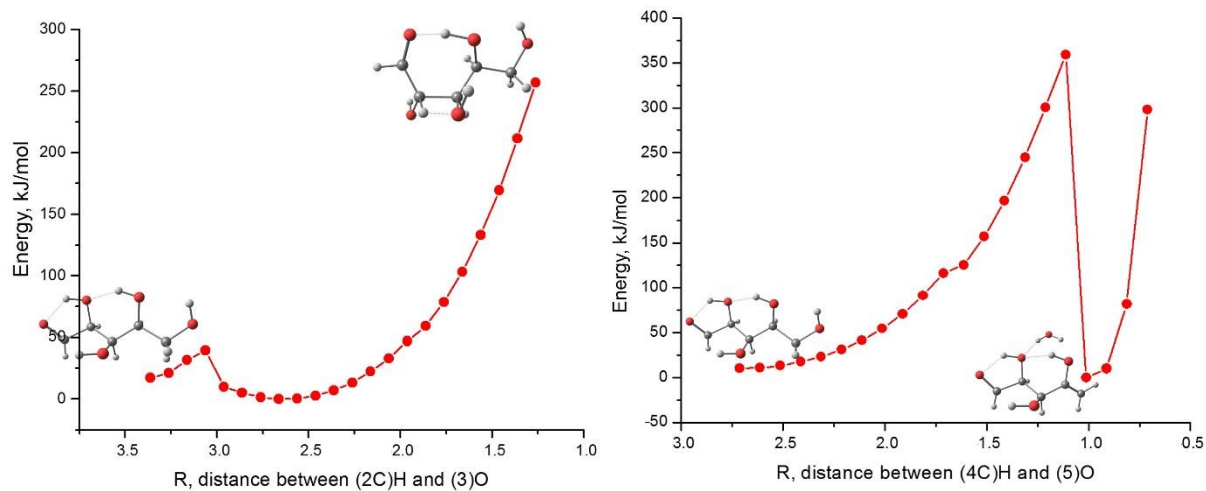

Figure S21. (left) Relaxed Potential Energy Surface scan of ribose<sup>-</sup> parent open chain (A) through forming of an H<sub>2</sub>O unit. R(Å): distance between (2C)H and (3)O. (right) Relaxed Potential Energy Surface scan of ribose<sup>-</sup> parent open chain (A) through forming of an H<sub>2</sub>O unit. R(Å): distance between (4C)H and (5)O.

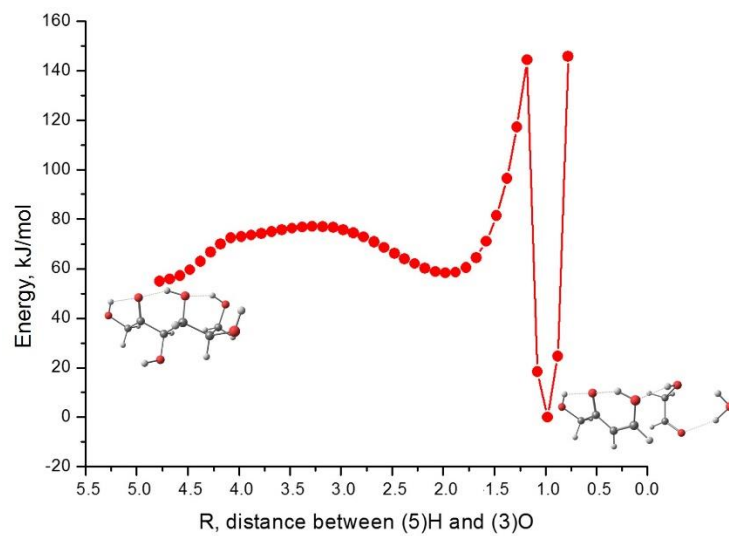

Figure S22. Relaxed Potential Energy Surface scan of fructose<sup>-</sup> parent open chain (A) through forming of an H<sub>2</sub>O unit. R(Å): distance between (5)H and (3)O.

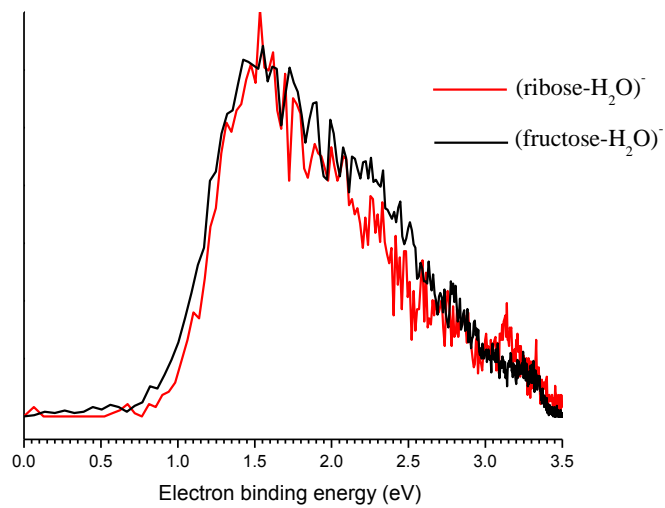

Figure 23 Photoelectron spectra of (ribose-H<sub>2</sub>O)<sup>-</sup> and (fructose-H<sub>2</sub>O)<sup>-</sup> recording with 355 nm photons with sample (D-ribose/DCM) spayed on a Zn substrate.

Table S1 The calculated VDEs and their relative energies ( $\Delta E$ ) of lower lying isomers of (ribose-H<sub>2</sub>O)<sup>-</sup> based on B3LYP/6-311++G(d,p), M062X/6-311++G(d,p),  $\omega$ B97XD/6-311++G(d,p), and MP2/6-311++G(d,p). Experimental results are given in the right hand column. All energies are in eV.

|                                               |            | B3LYP/6-311++G(d,p) | M062X/6-311++G(d,p) | $\omega$ B97XD/6-311++G(d,p) | MP2/6-311++G(d,p) | MP2/Aug-CC-PVTZ | experimental measurement |
|-----------------------------------------------|------------|---------------------|---------------------|------------------------------|-------------------|-----------------|--------------------------|
| (ribose-H <sub>2</sub> O) <sup>-</sup><br>(A) | $\Delta E$ | 0.00                | 0.03                | 0.04                         | 0.05              | 0.00            |                          |
|                                               | VDE        | 3.13                | 3.17                | 3.04                         | 2.22              | 2.50            |                          |
| (ribose-H <sub>2</sub> O) <sup>-</sup><br>(B) | $\Delta E$ | 0.04                | 0.00                | 0.00                         | 0.00              |                 |                          |
|                                               | VDE        | 3.09                | 3.03                | 3.04                         | 2.16              |                 |                          |
| (ribose-H <sub>2</sub> O) <sup>-</sup><br>(C) | $\Delta E$ | 0.32                | 0.26                | 0.33                         | 0.42              | 0.00            |                          |
|                                               | VDE        | 2.16                | 2.13                | 2.12                         | 1.50              | 1.13            | ~1.98                    |
| (ribose-H <sub>2</sub> O) <sup>-</sup><br>(D) | $\Delta E$ | 0.41                | 0.13                | 0.24                         | 0.10              |                 |                          |
|                                               | VDE        | 1.50                | 1.41                | 1.40                         | 0.84              |                 | ~1.53                    |
| (ribose-H <sub>2</sub> O) <sup>-</sup><br>(E) | $\Delta E$ | 0.43                | 0.13                | 0.23                         | 0.08              | 0.27            |                          |
|                                               | VDE        | 1.58                | 1.51                | 1.50                         | 0.96              | 1.68            |                          |
| (ribose-H <sub>2</sub> O) <sup>-</sup><br>(F) | $\Delta E$ | 0.44                | 0.37                | 0.48                         | 0.56              |                 |                          |
|                                               | VDE        | 1.97                | 2.02                | 1.90                         | 1.25              |                 |                          |

Table S2 Bond strengths (kJ/mol) of O—H, C—H and C—OH bonds for the lowest energy open chain isomer of ribose<sup>-</sup> and fructose<sup>-</sup>.

|                                            | O—H bond strength |      |      |      |      |      | C—OH bond strength |       |       |       |       |       |
|--------------------------------------------|-------------------|------|------|------|------|------|--------------------|-------|-------|-------|-------|-------|
|                                            | (1)H              | (2)H | (3)H | (4)H | (5)H | (6)H | (1)OH              | (2)OH | (3)OH | (4)OH | (5)OH | (6)OH |
| ribose <sup>-</sup><br>open chain<br>(A)   | —                 | 155  | 201  | 202  | 280  | —    | —                  | 151   | 241   | 279   | 377   | —     |
| fructose <sup>-</sup><br>open chain<br>(A) | 250               | —    | 191  | 163  | 242  | 261  | 143                | —     | 129   | 272   | 264   | 145   |

|                       |                | C—H bond strength |       |       |       |
|-----------------------|----------------|-------------------|-------|-------|-------|
|                       |                | (1C)H             | (2C)H | (3C)H | (4C)H |
| ribose <sup>-</sup>   | open chain (A) | —                 | 160   | 256   | 174   |
|                       | open chain (B) | —                 | 158   | 252   | 332   |
|                       | open chain (C) | —                 | 176   | 285   | 136   |
| fructose <sup>-</sup> | open chain (A) | 166               | —     | 173   | 319   |
|                       | open chain (B) | 204               | —     | 206   | 333   |
|                       | open chain (C) | 207               | —     | 223   |       |



Table S3 Bond strengths (kJ/mol) of O—H bond for the lowest energy furanose isomers of ribose<sup>-</sup> and fructose<sup>-</sup>.

|                           | O—H bond strength |      |      |      |      |      |
|---------------------------|-------------------|------|------|------|------|------|
|                           | (1)H              | (2)H | (3)H | (4)H | (5)H | (6)H |
| ribose <sup>-</sup> (G)   | 77                | 127  | 77   | —    | 190  | —    |
| fructose <sup>-</sup> (K) | 133               | 122  | 112  | 141  | —    | 183  |
